# Supplementary material for: Uncertainty in the housing market: evidence from US states
Source: publisher site journal article supplement (doi:10.1515/snde-2016-0064), 2017-09-29
Supplement: Supplementary file 1 [file data.xlsx]

## Sheet: house price index
House Price Index - seasonally adjusted (in logs)
	AL	AR	AZ	CA	CO	CT	DE	FL	GA	IA	ID	IL	IN	KS	KY	LA	MA	MD	ME	MI	MN	MO	MS	MT	NC	ND	NE	NH	NJ	NM	NV	NY	OH	OK	OR	PA	RI	SC	SD	TN	TX	UT	VA	VT	WA	WI	WV	WY	US
	hpi1	hpi2	hpi3	hpi4	hpi5	hpi6	hpi7	hpi8	hpi9	hpi10	hpi11	hpi12	hpi13	hpi14	hpi15	hpi16	hpi17	hpi18	hpi19	hpi20	hpi21	hpi22	hpi23	hpi24	hpi25	hpi26	hpi27	hpi28	hpi29	hpi30	hpi31	hpi32	hpi33	hpi34	hpi35	hpi36	hpi37	hpi38	hpi39	hpi40	hpi41	hpi42	hpi43	hpi44	hpi45	hpi46	hpi47	hpi48	hpi49
1988Q1	4.96832	4.83756	4.90238	5.09627	4.83287	5.57746	5.25567	4.95621	5.03814	4.64692	4.71031	4.96984	4.84671	4.76027	4.88192	4.62457	5.74131	5.12136	5.42242	4.85523	4.88213	4.95272	4.79867	4.69769	5.01829	4.67216	4.77562	5.45732	5.48278	4.8752	4.82515	5.62407	4.85495	4.58252	4.61521	5.14546	5.52004	4.98902	4.74059	4.96561	4.75099	4.72232	5.10307	5.21628	4.8008	4.78775	4.60703	4.40372	5.00139
1988Q2	4.96871	4.83834	4.91185	5.13876	4.83128	5.59313	5.28318	4.9722	5.05458	4.66363	4.71428	4.99603	4.86003	4.76421	4.89122	4.62036	5.76101	5.15304	5.44498	4.87517	4.89456	4.96123	4.8124	4.7076	5.03493	4.70062	4.78115	5.46878	5.50586	4.87423	4.83557	5.636	4.87543	4.58111	4.62112	5.18545	5.53896	5.00477	4.74196	4.97172	4.76043	4.73137	5.13273	5.25676	4.81559	4.80122	4.62178	4.37703	5.01984
1988Q3	4.96472	4.84051	4.89668	5.18003	4.82776	5.5855	5.30925	4.98213	5.05302	4.68169	4.70445	5.01647	4.86435	4.76209	4.90631	4.61556	5.75109	5.18495	5.46961	4.8911	4.89245	4.96823	4.8021	4.72745	5.03932	4.69815	4.78789	5.46814	5.5066	4.87881	4.84774	5.64192	4.88068	4.57496	4.65459	5.20612	5.54333	5.01261	4.76526	4.97412	4.74163	4.72395	5.15604	5.29357	4.83868	4.81776	4.63422	4.42197	5.02898
1988Q4	4.95976	4.84554	4.90818	5.23419	4.82401	5.5836	5.33604	4.99236	5.05404	4.68538	4.70549	5.03072	4.87766	4.77729	4.91772	4.60417	5.75859	5.21205	5.46964	4.90439	4.90378	4.97035	4.82463	4.72202	5.04707	4.66938	4.78818	5.46433	5.50618	4.86915	4.86007	5.64433	4.8952	4.58199	4.66849	5.21897	5.54793	5.02059	4.76542	4.973	4.74012	4.7285	5.17873	5.29975	4.85408	4.83019	4.6264	4.43598	5.0419
1989Q1	4.96441	4.84207	4.88962	5.28223	4.82078	5.57005	5.35091	4.99813	5.05884	4.69862	4.72992	5.05049	4.88526	4.7675	4.92871	4.61488	5.75247	5.2358	5.48238	4.91957	4.90348	4.97267	4.7776	4.71388	5.05149	4.6868	4.79499	5.46911	5.5038	4.87356	4.86231	5.64446	4.90614	4.58223	4.68412	5.23265	5.55875	5.03079	4.78728	4.97543	4.73733	4.72977	5.19724	5.31789	4.88216	4.84606	4.64384	4.36044	5.05228
1989Q2	4.96976	4.84214	4.88795	5.33321	4.82712	5.5722	5.38362	5.00483	5.06484	4.70761	4.73656	5.06597	4.89851	4.78035	4.93798	4.60475	5.74967	5.25833	5.49383	4.93518	4.91717	4.97827	4.81195	4.72208	5.05802	4.68706	4.80347	5.45638	5.50257	4.87955	4.8784	5.64343	4.91631	4.59102	4.70763	5.24013	5.57147	5.03179	4.75971	4.98246	4.73947	4.73001	5.21541	5.34526	4.92375	4.85502	4.65355	4.46629	5.06523
1989Q3	4.98691	4.85099	4.90294	5.38333	4.8503	5.57297	5.40792	5.0204	5.0754	4.72329	4.7549	5.08621	4.91433	4.78168	4.95397	4.62698	5.75839	5.27588	5.50425	4.95901	4.92999	4.98287	4.8336	4.73328	5.07055	4.70221	4.81355	5.47282	5.50574	4.89394	4.90058	5.65202	4.93293	4.61596	4.7332	5.2571	5.58807	5.05546	4.7945	4.98802	4.76251	4.75419	5.22905	5.36185	4.9733	4.86986	4.65994	4.4397	5.08432
1989Q4	4.99642	4.84932	4.9033	5.41478	4.84843	5.56677	5.4145	5.03056	5.08424	4.73879	4.76407	5.10304	4.92018	4.78526	4.96223	4.62704	5.76065	5.29544	5.50555	4.9676	4.93936	4.98918	4.82655	4.74277	5.07558	4.72419	4.82532	5.47046	5.51012	4.91063	4.91843	5.65504	4.94475	4.60643	4.76552	5.27225	5.58804	5.06078	4.77889	4.99153	4.76472	4.75583	5.23865	5.36755	5.03501	4.882	4.66439	4.45949	5.09579
1990Q1	4.99239	4.8492	4.89546	5.42932	4.85029	5.55293	5.42673	5.03263	5.07967	4.75085	4.77813	5.11423	4.92601	4.7835	4.964	4.6236	5.74921	5.30633	5.50128	4.98199	4.93885	4.99258	4.8339	4.73776	5.07904	4.71238	4.82978	5.44962	5.49657	4.8893	4.93616	5.65641	4.95524	4.60316	4.79837	5.27468	5.57796	5.06721	4.78028	4.99073	4.75841	4.75912	5.23869	5.36195	5.09913	4.89535	4.68011	4.49882	5.10083
1990Q2	4.99701	4.84852	4.89064	5.43561	4.85474	5.52582	5.42487	5.03152	5.07348	4.76042	4.81523	5.12226	4.93466	4.77883	4.97391	4.62792	5.72532	5.30835	5.48297	4.99377	4.93711	4.98884	4.81793	4.76195	5.08319	4.71357	4.84584	5.41162	5.47679	4.89602	4.95235	5.64507	4.96462	4.60818	4.84693	5.27721	5.56945	5.07648	4.82223	4.98954	4.76232	4.76957	5.23753	5.36633	5.15239	4.90879	4.65632	4.48414	5.10445
1990Q3	4.99843	4.85611	4.8968	5.43802	4.86365	5.5138	5.41592	5.03455	5.07668	4.77088	4.83608	5.13227	4.94206	4.7814	4.97884	4.63098	5.70195	5.31329	5.46736	5.00008	4.94181	4.98949	4.83069	4.79417	5.08762	4.72371	4.85496	5.38907	5.46301	4.90509	4.97363	5.63759	4.97461	4.61224	4.87997	5.27652	5.56775	5.08346	4.82808	4.98998	4.76899	4.78307	5.23569	5.35694	5.17137	4.91972	4.70208	4.52796	5.10836
1990Q4	5.00237	4.85536	4.89174	5.43133	4.86909	5.48298	5.41496	5.03306	5.07214	4.78645	4.83526	5.13934	4.94949	4.77941	4.9779	4.63813	5.67737	5.30911	5.46602	5.00614	4.94494	4.98268	4.82487	4.79607	5.08899	4.725	4.85928	5.35054	5.44492	4.9102	4.98736	5.6265	4.98061	4.61038	4.90246	5.27415	5.54067	5.08092	4.83137	4.98695	4.76614	4.78366	5.225	5.36317	5.18314	4.92849	4.69451	4.52175	5.10716
1991Q1	5.01303	4.86146	4.90474	5.43332	4.87975	5.48113	5.43104	5.04195	5.08162	4.7974	4.8533	5.15084	4.96414	4.78283	4.99509	4.63701	5.66881	5.31455	5.44434	5.01781	4.95753	4.99531	4.8383	4.79332	5.09668	4.73109	4.86727	5.33553	5.4399	4.91465	5.00848	5.62705	4.99167	4.62841	4.92024	5.28391	5.54446	5.09095	4.849	4.9956	4.77671	4.81009	5.23255	5.35229	5.2006	4.94155	4.69771	4.51759	5.11547
1991Q2	5.02436	4.8705	4.91343	5.43006	4.88934	5.47315	5.43655	5.04844	5.0866	4.80579	4.85621	5.15977	4.97171	4.78716	5.00301	4.65302	5.66288	5.32549	5.46187	5.02823	4.96518	4.99914	4.83608	4.81985	5.10456	4.74413	4.8753	5.3255	5.43481	4.92626	5.0189	5.63342	5.00582	4.63542	4.93988	5.29207	5.53038	5.1002	4.87119	5.00012	4.7844	4.82608	5.23482	5.3538	5.20888	4.95221	4.71626	4.57113	5.12182
1991Q3	5.02828	4.87568	4.90726	5.42454	4.89834	5.45939	5.43579	5.04493	5.08084	4.81194	4.87871	5.16488	4.97702	4.79057	5.00706	4.66162	5.64583	5.32246	5.44562	5.03602	4.96615	5.00166	4.83569	4.82801	5.10231	4.74293	4.88279	5.30212	5.42874	4.92981	5.01836	5.62847	5.009	4.64205	4.95491	5.29038	5.51722	5.10382	4.86206	5.00091	4.78441	4.82929	5.22776	5.35051	5.21554	4.9655	4.70949	4.56643	5.1214
1991Q4	5.04707	4.89672	4.9393	5.43164	4.9164	5.46534	5.44749	5.06247	5.09322	4.83403	4.90469	5.1823	4.99533	4.80387	5.02091	4.6805	5.65483	5.34301	5.44874	5.05089	4.98629	5.01263	4.86289	4.86582	5.11879	4.75943	4.89436	5.30398	5.43878	4.94754	5.04124	5.63703	5.02649	4.66138	4.9804	5.30756	5.52177	5.12256	4.89019	5.01925	4.79996	4.85491	5.24565	5.35105	5.23885	4.98069	4.74221	4.5864	5.13753
1992Q1	5.05711	4.90095	4.94266	5.42908	4.93232	5.46893	5.44741	5.07301	5.09973	4.8363	4.9155	5.1885	5.00272	4.80938	5.02833	4.69511	5.65332	5.34623	5.45798	5.05887	4.99001	5.01922	4.87127	4.89142	5.1272	4.77293	4.90746	5.30039	5.4461	4.97198	5.05182	5.65685	5.03831	4.66905	5.00147	5.31467	5.5172	5.12747	4.91094	5.02686	4.81546	4.86582	5.25261	5.35368	5.23976	4.99222	4.74416	4.60054	5.14568
1992Q2	5.0571	4.89683	4.94148	5.42117	4.95099	5.45635	5.44388	5.06705	5.10206	4.84937	4.92576	5.19585	5.01151	4.8128	5.03532	4.70038	5.64469	5.3396	5.4402	5.06339	4.99585	5.02062	4.87811	4.89988	5.12985	4.77724	4.9183	5.28342	5.44045	4.97592	5.04959	5.64276	5.0443	4.664	5.01094	5.31397	5.51097	5.12876	4.90742	5.02291	4.8085	4.88066	5.2426	5.35777	5.24744	5.00546	4.75335	4.61562	5.14486
1992Q3	5.07352	4.91266	4.94635	5.41446	4.97215	5.45669	5.44842	5.08188	5.11978	4.85902	4.94371	5.20383	5.02409	4.8237	5.0477	4.71249	5.64595	5.34924	5.44565	5.07055	5.00562	5.02674	4.88232	4.92275	5.13735	4.78518	4.93172	5.27915	5.4477	4.98296	5.06443	5.65184	5.05573	4.68188	5.03394	5.32193	5.5112	5.14184	4.9384	5.04533	4.82548	4.89859	5.25609	5.36682	5.26296	5.01703	4.76853	4.62519	5.15438
1992Q4	5.08387	4.92143	4.95372	5.40471	4.99402	5.45264	5.45583	5.08238	5.12255	4.8747	4.97287	5.21628	5.03336	4.82804	5.05752	4.72498	5.64806	5.35296	5.44538	5.08032	5.01462	5.03269	4.8877	4.95519	5.14359	4.80101	4.94264	5.27632	5.4521	5.00028	5.07207	5.66004	5.06728	4.6862	5.05513	5.3274	5.50816	5.1476	4.9551	5.04502	4.83306	4.92698	5.25872	5.36714	5.27569	5.03474	4.78168	4.65143	5.16123
1993Q1	5.09331	4.9278	4.95263	5.39148	5.01348	5.4367	5.4484	5.08348	5.12577	4.88233	4.98463	5.22143	5.03986	4.83535	5.06316	4.7355	5.64248	5.34865	5.43387	5.08457	5.02246	5.03538	4.88819	4.98354	5.14762	4.80403	4.95248	5.26619	5.45105	5.01099	5.07147	5.64372	5.073	4.6915	5.07061	5.32724	5.50234	5.14893	4.96139	5.04939	4.83584	4.94594	5.25688	5.36404	5.27752	5.04312	4.78526	4.65864	5.16234
1993Q2	5.10121	4.9457	4.96521	5.38491	5.03429	5.44598	5.45552	5.0966	5.13685	4.89398	5.01267	5.22915	5.04819	4.83998	5.07335	4.74678	5.65107	5.35274	5.45082	5.09019	5.03236	5.04029	4.90683	5.00534	5.15686	4.82615	4.96048	5.28134	5.46031	5.03388	5.08085	5.66466	5.08345	4.70443	5.08772	5.33476	5.51012	5.15808	4.98392	5.06222	4.84239	4.9763	5.26275	5.36972	5.28739	5.05208	4.79573	4.68522	5.17088
1993Q3	5.11736	4.96106	4.97274	5.37246	5.06133	5.44322	5.45377	5.10253	5.14151	4.91213	5.0382	5.23876	5.05812	4.85398	5.08116	4.76434	5.65113	5.35612	5.44249	5.0982	5.0429	5.04656	4.91832	5.01721	5.16391	4.84119	4.97458	5.28339	5.46174	5.05486	5.08594	5.66021	5.09412	4.71921	5.10974	5.33766	5.50759	5.16875	5.00552	5.07477	4.85384	5.01222	5.26514	5.37247	5.30113	5.06645	4.81805	4.70706	5.17757
1993Q4	5.12762	4.97499	4.98602	5.3661	5.08864	5.44263	5.45572	5.11147	5.14997	4.92876	5.05796	5.25034	5.07105	4.86394	5.09393	4.78127	5.65747	5.36018	5.44829	5.10871	5.05569	5.05538	4.92636	5.05056	5.17333	4.85354	4.99484	5.28327	5.46787	5.07361	5.09322	5.66563	5.10714	4.73534	5.13337	5.34524	5.51115	5.17409	5.02335	5.08623	4.86561	5.05029	5.26937	5.37613	5.31483	5.08357	4.82422	4.73336	5.18722
1994Q1	5.13429	4.99294	4.99936	5.35847	5.11961	5.43446	5.4496	5.11113	5.15412	4.9471	5.06847	5.2633	5.0815	4.88398	5.11037	4.79998	5.65956	5.36072	5.44774	5.12102	5.06154	5.06795	4.94154	5.07659	5.18409	4.86229	5.00984	5.28449	5.46941	5.10418	5.09542	5.65593	5.11966	4.74198	5.15923	5.3466	5.50414	5.18069	5.04338	5.09653	4.87062	5.08822	5.27257	5.37909	5.32594	5.11078	4.8412	4.7617	5.19443
1994Q2	5.14608	5.00238	5.01368	5.33543	5.15962	5.41707	5.442	5.10663	5.15942	4.96999	5.10352	5.27648	5.09518	4.90823	5.13459	4.81828	5.65054	5.35327	5.42591	5.13562	5.07937	5.08494	4.95531	5.11387	5.19873	4.89264	5.03723	5.27094	5.4628	5.13242	5.09954	5.64126	5.13466	4.75739	5.19206	5.34175	5.48593	5.18717	5.05708	5.10965	4.87247	5.14301	5.27085	5.36985	5.34354	5.14199	4.84567	4.78122	5.19948
1994Q3	5.1486	5.01314	5.02383	5.31739	5.18457	5.40134	5.43217	5.1054	5.16165	4.98717	5.11219	5.28524	5.10519	4.92014	5.14373	4.82773	5.6473	5.34435	5.41876	5.15374	5.08495	5.09925	4.96702	5.13283	5.20924	4.90176	5.05951	5.25656	5.45226	5.15534	5.1022	5.63474	5.14	4.75853	5.21602	5.33385	5.4668	5.18945	5.06717	5.12304	4.87219	5.17424	5.27001	5.37175	5.34875	5.16334	4.87294	4.81075	5.20253
1994Q4	5.15161	5.02472	5.03584	5.30195	5.1937	5.38729	5.42546	5.10459	5.16634	4.99246	5.11978	5.28828	5.10837	4.93186	5.15615	4.82928	5.64004	5.33441	5.40065	5.16876	5.09047	5.10294	4.98176	5.13917	5.22191	4.90936	5.06367	5.25133	5.44039	5.1716	5.09986	5.61797	5.14886	4.76136	5.23533	5.32448	5.4511	5.19441	5.09115	5.13225	4.86837	5.19391	5.26777	5.37462	5.34922	5.16848	4.86682	4.82292	5.20288
1995Q1	5.16184	5.02577	5.04797	5.29769	5.21439	5.381	5.42622	5.10767	5.1723	5.00345	5.12531	5.29746	5.12197	4.94376	5.1668	4.84223	5.64728	5.33197	5.40916	5.18762	5.09996	5.11782	4.98411	5.15898	5.23188	4.92416	5.07729	5.25406	5.43906	5.17653	5.10753	5.61478	5.15566	4.76789	5.25614	5.32195	5.45592	5.20326	5.0729	5.14533	4.86928	5.21811	5.265	5.3553	5.35841	5.18219	4.87709	4.84319	5.20874
1995Q2	5.1798	5.05503	5.06661	5.30825	5.23056	5.3985	5.43469	5.12378	5.19162	5.02224	5.14886	5.31127	5.13836	4.95875	5.18205	4.8589	5.66581	5.34828	5.42723	5.20456	5.11887	5.12691	5.00437	5.17587	5.24457	4.93537	5.09092	5.26986	5.45124	5.20083	5.12857	5.62896	5.17332	4.78224	5.27948	5.33962	5.47529	5.21489	5.1095	5.16491	4.8862	5.24734	5.27968	5.38482	5.36943	5.19939	4.89043	4.86271	5.22428
1995Q3	5.19473	5.06747	5.08467	5.31636	5.25004	5.41963	5.44977	5.14045	5.20349	5.03514	5.16624	5.3229	5.15443	4.96784	5.19591	4.87406	5.67955	5.36029	5.44594	5.22054	5.13423	5.1401	5.01827	5.1944	5.25927	4.94341	5.10383	5.28906	5.46712	5.22115	5.142	5.64387	5.19044	4.79805	5.30231	5.3562	5.49095	5.22613	5.11456	5.17879	4.89661	5.2789	5.2921	5.38403	5.38166	5.21297	4.90461	4.87133	5.23837
1995Q4	5.20436	5.07063	5.0957	5.31532	5.2676	5.42016	5.44914	5.14867	5.2189	5.04794	5.1749	5.33372	5.16787	4.98481	5.20582	4.88661	5.68662	5.36841	5.44566	5.2404	5.14917	5.14968	5.02896	5.20003	5.27078	4.95302	5.11537	5.30135	5.47111	5.22838	5.15177	5.6433	5.2035	4.80607	5.32108	5.3606	5.49682	5.24005	5.13647	5.19463	4.90522	5.30167	5.29378	5.391	5.39214	5.22847	4.91938	4.89709	5.24754
1996Q1	5.2221	5.0855	5.11273	5.31684	5.281	5.43281	5.45818	5.15663	5.23143	5.06153	5.19192	5.34346	5.18052	4.99203	5.21843	4.9014	5.70035	5.3755	5.46726	5.25602	5.16285	5.16032	5.03788	5.22124	5.28376	4.97602	5.12951	5.30779	5.48213	5.23354	5.16227	5.66231	5.21789	4.81903	5.34065	5.37268	5.50292	5.25379	5.14887	5.20891	4.91516	5.32265	5.30581	5.40303	5.40076	5.23696	4.92929	4.90867	5.25894
1996Q2	5.22069	5.08702	5.11526	5.30512	5.29264	5.42283	5.45266	5.15685	5.23706	5.06806	5.18111	5.34686	5.18931	5.00463	5.22624	4.91286	5.70044	5.36998	5.45614	5.28049	5.1702	5.1719	5.04188	5.22657	5.29274	4.9667	5.14409	5.30535	5.47549	5.23275	5.15919	5.65322	5.22666	4.8243	5.35407	5.36344	5.49159	5.2591	5.14553	5.21913	4.91326	5.3359	5.30424	5.39521	5.40118	5.24316	4.9334	4.91485	5.26048
1996Q3	5.22364	5.088	5.12322	5.30008	5.30282	5.40691	5.45394	5.15635	5.24463	5.07539	5.18425	5.35111	5.19571	5.01716	5.2369	4.91722	5.70284	5.36096	5.45178	5.30167	5.17677	5.17933	5.05862	5.23596	5.30251	4.98167	5.15861	5.31571	5.47164	5.23114	5.15748	5.64513	5.2341	4.83103	5.36906	5.35996	5.47456	5.26492	5.15928	5.23045	4.91469	5.3516	5.30004	5.38664	5.40481	5.25425	4.93496	4.92154	5.26382
1996Q4	5.23521	5.09758	5.13308	5.30609	5.31716	5.41313	5.46431	5.16086	5.25281	5.08551	5.19277	5.36195	5.21009	5.02569	5.24705	4.93385	5.71748	5.37224	5.47024	5.31801	5.19018	5.19166	5.06537	5.24445	5.31166	4.98531	5.16772	5.32056	5.47355	5.23578	5.16868	5.64697	5.24452	4.83753	5.38763	5.36518	5.47989	5.28073	5.15808	5.24025	4.91943	5.36929	5.30695	5.38901	5.41638	5.26873	4.93813	4.92554	5.27277
1997Q1	5.24461	5.10532	5.14243	5.31232	5.32982	5.41676	5.46192	5.17005	5.26413	5.09578	5.19991	5.3676	5.21735	5.03265	5.262	4.94259	5.72798	5.3713	5.46225	5.33687	5.20222	5.20136	5.0728	5.24815	5.32449	4.98286	5.1796	5.33096	5.47896	5.24239	5.17304	5.64888	5.25665	4.843	5.40273	5.37005	5.48195	5.28599	5.1685	5.25072	4.92366	5.384	5.31359	5.40424	5.42179	5.27995	4.94771	4.93254	5.28066
1997Q2	5.25283	5.11684	5.15058	5.32335	5.34231	5.42523	5.46515	5.17592	5.27731	5.10391	5.20531	5.37529	5.22794	5.04318	5.26736	4.94965	5.74152	5.37264	5.47419	5.35464	5.21323	5.20963	5.07803	5.25179	5.337	4.98909	5.19276	5.34323	5.48486	5.24886	5.17617	5.65821	5.26457	4.85002	5.41465	5.3727	5.48406	5.29856	5.18765	5.26174	4.93158	5.39269	5.31731	5.39651	5.43492	5.28647	4.95923	4.94228	5.28956
1997Q3	5.26891	5.12217	5.1665	5.34032	5.35608	5.43462	5.47223	5.18714	5.29218	5.118	5.21939	5.38462	5.24137	5.055	5.27985	4.96282	5.75345	5.38072	5.48594	5.37039	5.22823	5.22143	5.09142	5.26378	5.35024	5.00405	5.20428	5.35302	5.4938	5.25528	5.19082	5.66437	5.27906	4.8609	5.43426	5.38237	5.50043	5.31444	5.19772	5.27349	4.94019	5.41145	5.32757	5.40593	5.45398	5.29947	4.96847	4.94851	5.30213
1997Q4	5.2801	5.13225	5.18068	5.35841	5.37314	5.44505	5.48197	5.2029	5.30665	5.12977	5.23239	5.39498	5.25453	5.06938	5.29226	4.9807	5.77118	5.39101	5.50232	5.38801	5.24597	5.23212	5.10796	5.28146	5.36599	5.0219	5.22038	5.36885	5.50691	5.26235	5.19574	5.67783	5.29164	4.87681	5.44677	5.39112	5.51272	5.32884	5.21479	5.28759	4.95305	5.42798	5.33726	5.40796	5.46992	5.31214	4.98412	4.96659	5.31597
1998Q1	5.29623	5.14301	5.19346	5.38041	5.3883	5.46719	5.49504	5.21967	5.32462	5.14201	5.24112	5.40284	5.26394	5.08291	5.30036	4.9929	5.78654	5.39935	5.51609	5.40055	5.26319	5.24139	5.12019	5.28941	5.37811	5.03932	5.23308	5.38622	5.52266	5.26852	5.20569	5.70192	5.30229	4.89019	5.45964	5.40466	5.5255	5.34328	5.22495	5.3036	4.96865	5.43722	5.34535	5.41802	5.48695	5.31806	5.00213	4.98025	5.33016
1998Q2	5.30592	5.145	5.20521	5.40258	5.39924	5.47001	5.50052	5.22501	5.33511	5.15279	5.24699	5.40753	5.27303	5.08871	5.31214	5.00268	5.80546	5.40425	5.52441	5.41628	5.26966	5.25021	5.13517	5.28864	5.38568	5.046	5.23285	5.40329	5.52818	5.26921	5.21255	5.70682	5.31201	4.89945	5.46815	5.40975	5.52723	5.3543	5.22862	5.31357	4.97483	5.45023	5.35147	5.42489	5.50255	5.3285	4.99535	4.97696	5.33994
1998Q3	5.31708	5.16183	5.21714	5.42622	5.41548	5.48261	5.50309	5.23564	5.35132	5.16343	5.2532	5.41579	5.28401	5.10529	5.3248	5.01872	5.82707	5.40942	5.53416	5.43116	5.28611	5.26105	5.14226	5.29437	5.39907	5.05814	5.2492	5.41897	5.53458	5.27932	5.21474	5.71228	5.3248	4.9091	5.47817	5.41425	5.53238	5.3681	5.23731	5.32557	4.9905	5.46037	5.35736	5.4245	5.51925	5.33902	5.01372	4.9831	5.35277
1998Q4	5.32685	5.17142	5.22987	5.44608	5.43025	5.49735	5.51109	5.24945	5.36645	5.17793	5.26057	5.4246	5.29267	5.11906	5.33794	5.02896	5.84451	5.41866	5.54966	5.44394	5.30204	5.27127	5.15507	5.30627	5.40995	5.06333	5.26259	5.43745	5.54622	5.28699	5.22253	5.72892	5.33583	4.92491	5.48838	5.42579	5.54483	5.38182	5.24073	5.33648	5.00202	5.46728	5.36685	5.43914	5.53401	5.34535	5.02687	4.98723	5.36544
1999Q1	5.32998	5.17449	5.23947	5.46186	5.44924	5.50951	5.52324	5.25386	5.38033	5.18643	5.26668	5.43323	5.30161	5.1294	5.3455	5.03567	5.86696	5.42515	5.56025	5.4605	5.3189	5.284	5.16639	5.3072	5.41816	5.06592	5.27215	5.45569	5.55648	5.28865	5.22253	5.73797	5.34472	4.93127	5.49108	5.43079	5.55124	5.39539	5.25268	5.34344	5.01141	5.47094	5.37633	5.44574	5.54127	5.36214	5.02894	4.99274	5.3751
1999Q2	5.33586	5.17765	5.25388	5.47928	5.47836	5.52311	5.53334	5.26524	5.39686	5.1997	5.27356	5.44533	5.30802	5.14572	5.35704	5.04857	5.897	5.43359	5.58168	5.4794	5.34743	5.29846	5.18009	5.31767	5.42914	5.06878	5.28584	5.48131	5.57151	5.28866	5.223	5.75433	5.35403	4.94207	5.49853	5.43583	5.56463	5.40935	5.26344	5.34923	5.03037	5.47071	5.38911	5.45802	5.55938	5.37727	5.02794	5.00818	5.38936
1999Q3	5.33864	5.18281	5.26711	5.49996	5.50835	5.53955	5.54664	5.27595	5.41237	5.20578	5.2664	5.45824	5.31221	5.15631	5.366	5.05488	5.93424	5.44095	5.60135	5.49812	5.37386	5.30957	5.18442	5.32741	5.43496	5.07035	5.29095	5.50922	5.5918	5.28664	5.22748	5.77993	5.35777	4.95302	5.50124	5.44102	5.58067	5.41964	5.26916	5.35482	5.04581	5.45993	5.40466	5.47705	5.56957	5.38951	5.03107	5.01721	5.40229
1999Q4	5.34301	5.18445	5.27741	5.5219	5.52919	5.55403	5.55419	5.28753	5.42446	5.21329	5.26521	5.46987	5.31756	5.16507	5.37443	5.05837	5.96094	5.45229	5.612	5.51364	5.39229	5.32085	5.18448	5.32701	5.43971	5.06326	5.29851	5.53119	5.60666	5.28869	5.22888	5.80136	5.36386	4.95444	5.50538	5.44422	5.59975	5.42719	5.27926	5.35817	5.05851	5.46063	5.41865	5.48907	5.5806	5.39857	5.02743	5.02115	5.41343
2000Q1	5.34771	5.18876	5.29823	5.5646	5.56575	5.5726	5.5692	5.30614	5.43745	5.22361	5.27506	5.48961	5.32469	5.18333	5.38807	5.07224	6.00472	5.4688	5.63394	5.53627	5.4207	5.33928	5.19355	5.34182	5.4485	5.07388	5.30624	5.57338	5.63169	5.29153	5.2367	5.81752	5.37325	4.96575	5.51358	5.4529	5.63086	5.43745	5.28168	5.36516	5.07378	5.4634	5.43546	5.5098	5.59565	5.42667	5.03212	5.03526	5.43174
2000Q2	5.35721	5.20034	5.31139	5.59144	5.58947	5.59937	5.58897	5.32527	5.45429	5.23663	5.27807	5.50631	5.33466	5.19029	5.39769	5.0779	6.03417	5.48303	5.66106	5.54854	5.44819	5.35095	5.20205	5.35071	5.46107	5.08199	5.31658	5.60324	5.65592	5.2954	5.25179	5.8447	5.38609	4.97722	5.52184	5.46917	5.6625	5.45023	5.2985	5.37329	5.08923	5.46779	5.45593	5.53048	5.60603	5.43183	5.04112	5.04336	5.44869
2000Q3	5.36616	5.20584	5.32373	5.62263	5.6129	5.61838	5.60535	5.34539	5.46957	5.24938	5.28789	5.52124	5.34752	5.20462	5.40699	5.08827	6.06642	5.4994	5.67958	5.56506	5.46857	5.36636	5.21589	5.3607	5.47368	5.08767	5.3266	5.63582	5.68055	5.30304	5.25798	5.87142	5.39852	4.99141	5.5309	5.47989	5.68866	5.46252	5.31662	5.38331	5.10357	5.47913	5.47098	5.54717	5.61887	5.44588	5.04946	5.05107	5.46557
2000Q4	5.37574	5.21729	5.3397	5.65439	5.63891	5.63405	5.6199	5.36648	5.48514	5.25717	5.29888	5.53446	5.3565	5.21702	5.41924	5.09676	6.09424	5.51582	5.70342	5.58156	5.49311	5.38046	5.22483	5.37685	5.48454	5.09991	5.33537	5.66622	5.7001	5.30608	5.27457	5.88916	5.41106	4.9984	5.54267	5.49065	5.71089	5.47563	5.32076	5.39107	5.11534	5.49009	5.49004	5.56677	5.63431	5.46041	5.06105	5.0769	5.48173
2001Q1	5.4058	5.24206	5.36094	5.69271	5.66575	5.65964	5.64102	5.39435	5.51319	5.27839	5.31984	5.54726	5.37655	5.23434	5.43676	5.12093	6.12225	5.53725	5.73168	5.59703	5.5196	5.39559	5.24801	5.39794	5.50535	5.12444	5.34884	5.69249	5.72285	5.33177	5.29586	5.913	5.42908	5.02227	5.56718	5.51547	5.73176	5.50158	5.3407	5.4144	5.14475	5.51081	5.51525	5.58233	5.65573	5.47352	5.08643	5.08248	5.5057
2001Q2	5.41155	5.25043	5.37727	5.72226	5.68546	5.6798	5.6574	5.41941	5.52665	5.28908	5.33415	5.56377	5.38686	5.24643	5.44715	5.13357	6.14999	5.55809	5.75038	5.60917	5.54434	5.41076	5.25559	5.41056	5.51484	5.13248	5.35748	5.72337	5.74994	5.33858	5.30935	5.93317	5.44027	5.03235	5.57841	5.53275	5.76519	5.51303	5.35384	5.42251	5.15639	5.51696	5.53722	5.6039	5.66954	5.48731	5.09469	5.10081	5.52291
2001Q3	5.41828	5.25959	5.39102	5.7414	5.70199	5.70153	5.67556	5.44188	5.53865	5.29556	5.34008	5.58094	5.3922	5.25694	5.45633	5.1415	6.18027	5.58186	5.77627	5.62128	5.57093	5.4252	5.26439	5.41605	5.52285	5.1383	5.36592	5.75369	5.77434	5.34489	5.32534	5.95788	5.44987	5.04219	5.5866	5.54544	5.79856	5.52031	5.36176	5.42798	5.16372	5.51783	5.55719	5.62403	5.67923	5.4998	5.10195	5.11538	5.53718
2001Q4	5.42734	5.26842	5.40136	5.75645	5.71297	5.72101	5.69039	5.46527	5.55082	5.30728	5.35096	5.59193	5.40145	5.26778	5.46334	5.1505	6.20339	5.59951	5.79515	5.63089	5.58823	5.43609	5.27375	5.42429	5.53191	5.14785	5.37488	5.77415	5.7976	5.35103	5.33974	5.97721	5.45772	5.05307	5.5958	5.55703	5.82226	5.53122	5.36965	5.43852	5.17453	5.52612	5.5732	5.63901	5.68821	5.50929	5.11184	5.12976	5.55002
2002Q1	5.43051	5.27329	5.41439	5.78464	5.72412	5.74429	5.70846	5.48661	5.55954	5.31726	5.35141	5.60935	5.40816	5.27951	5.46986	5.15554	6.23334	5.62452	5.8167	5.64302	5.60949	5.45082	5.27582	5.44876	5.53705	5.15918	5.38413	5.80453	5.828	5.35806	5.35465	6.00307	5.46541	5.05929	5.60759	5.57323	5.86333	5.53714	5.38315	5.44303	5.17927	5.52313	5.59465	5.65795	5.6987	5.52422	5.11779	5.1488	5.56468
2002Q2	5.43654	5.27933	5.42748	5.8167	5.7349	5.77069	5.73365	5.51506	5.56843	5.32182	5.35827	5.62606	5.41319	5.28905	5.47809	5.16521	6.26773	5.65679	5.84884	5.65438	5.63467	5.46507	5.27466	5.45727	5.54226	5.16868	5.38893	5.83748	5.86294	5.3706	5.37067	6.03233	5.47338	5.06928	5.6159	5.5912	5.90944	5.54361	5.39519	5.44674	5.18588	5.52467	5.62001	5.68106	5.71029	5.53858	5.12717	5.16168	5.58169
2002Q3	5.45124	5.29475	5.44448	5.85177	5.74734	5.79531	5.75749	5.5433	5.58452	5.33385	5.37257	5.63817	5.42258	5.29903	5.48975	5.18209	6.29469	5.68507	5.87272	5.66273	5.65354	5.47685	5.29101	5.47436	5.55664	5.18713	5.39702	5.86379	5.89202	5.38545	5.39024	6.06063	5.48332	5.08157	5.6312	5.61032	5.94255	5.55889	5.40499	5.46028	5.20162	5.53664	5.64302	5.69621	5.72272	5.54809	5.13783	5.17775	5.60031
2002Q4	5.46069	5.30499	5.45622	5.88093	5.75486	5.81775	5.77379	5.56475	5.59449	5.34185	5.38102	5.65051	5.42673	5.30854	5.49777	5.19529	6.31886	5.70669	5.89271	5.66942	5.67144	5.48886	5.30086	5.48467	5.5623	5.20083	5.40532	5.88841	5.91728	5.394	5.40275	6.08374	5.48936	5.09342	5.63971	5.62686	5.976	5.56647	5.41437	5.46802	5.2113	5.54003	5.65899	5.70662	5.73265	5.55658	5.15279	5.19062	5.61448
2003Q1	5.47188	5.31422	5.46838	5.90704	5.7582	5.83275	5.7899	5.58839	5.60221	5.34915	5.39328	5.66114	5.43472	5.31469	5.50502	5.20689	6.33932	5.72787	5.91105	5.67654	5.68543	5.49681	5.30747	5.49699	5.56972	5.20867	5.41177	5.90625	5.93857	5.40844	5.42289	6.10645	5.49618	5.10132	5.65114	5.63953	6.00854	5.5727	5.42342	5.47551	5.2186	5.54232	5.67637	5.7184	5.74033	5.56574	5.15514	5.2025	5.62759
2003Q2	5.48192	5.32058	5.47864	5.9238	5.7628	5.84716	5.80963	5.61016	5.61124	5.35686	5.40162	5.67068	5.44223	5.32157	5.51451	5.2175	6.35448	5.74734	5.92774	5.68586	5.69702	5.50584	5.31622	5.51616	5.57773	5.22214	5.41622	5.92093	5.95386	5.41768	5.44013	6.12894	5.50512	5.11267	5.6605	5.65304	6.02999	5.58404	5.42736	5.48464	5.22337	5.54844	5.68969	5.73497	5.74794	5.5761	5.16659	5.22244	5.63979
2003Q3	5.48788	5.33225	5.49333	5.95475	5.76559	5.86889	5.83234	5.63412	5.617	5.36871	5.40744	5.68432	5.44714	5.32868	5.52371	5.22684	6.37211	5.77541	5.95261	5.69391	5.71818	5.51727	5.32011	5.5374	5.58323	5.23322	5.42462	5.94334	5.98123	5.42906	5.46739	6.14279	5.51279	5.11966	5.67229	5.67186	6.06763	5.5886	5.44309	5.49045	5.2261	5.54998	5.71171	5.75805	5.7601	5.58971	5.17805	5.23509	5.65391
2003Q4	5.49299	5.34585	5.52558	6.01567	5.77761	5.90557	5.86794	5.67719	5.62703	5.38302	5.42184	5.7152	5.45467	5.34486	5.53624	5.24189	6.41377	5.82854	5.99038	5.70729	5.75376	5.53842	5.32683	5.56475	5.59096	5.25604	5.44293	5.98245	6.03115	5.45125	5.52665	6.19004	5.52512	5.12862	5.69795	5.70022	6.13107	5.59645	5.46558	5.50011	5.23117	5.55004	5.75291	5.8087	5.7862	5.62204	5.18734	5.25545	5.68111
2004Q1	5.50393	5.3591	5.54411	6.05137	5.78617	5.92462	5.90134	5.71011	5.64003	5.39152	5.43462	5.726	5.46105	5.35434	5.54733	5.25366	6.43092	5.85915	6.01175	5.71321	5.76565	5.54994	5.33758	5.58251	5.60127	5.26606	5.44936	5.99857	6.05437	5.46447	5.57972	6.20915	5.53096	5.14231	5.7128	5.71919	6.15746	5.60892	5.47004	5.50998	5.23878	5.55997	5.78066	5.82251	5.8013	5.62894	5.20421	5.27794	5.69795
2004Q2	5.51049	5.37662	5.57848	6.10957	5.79421	5.95504	5.92296	5.75378	5.64993	5.40278	5.4616	5.74866	5.46724	5.36395	5.55822	5.26901	6.45459	5.90186	6.04385	5.72315	5.78686	5.56558	5.34889	5.60575	5.6124	5.28306	5.46228	6.02561	6.08448	5.484	5.66445	6.23665	5.53865	5.14936	5.74089	5.7462	6.20115	5.61905	5.48632	5.52061	5.24718	5.57022	5.81478	5.85229	5.82961	5.65119	5.22334	5.30171	5.72203
2004Q3	5.52782	5.39166	5.63699	6.20313	5.80702	6.00428	5.98074	5.8142	5.66432	5.41658	5.4916	5.78211	5.47687	5.37541	5.57114	5.28609	6.50185	5.97207	6.08749	5.73791	5.82015	5.58746	5.36135	5.64115	5.62326	5.31091	5.48011	6.06702	6.14719	5.50893	5.78337	6.28789	5.55072	5.15762	5.78233	5.78524	6.26701	5.63811	5.50545	5.53541	5.25475	5.58178	5.87625	5.91155	5.87037	5.68658	5.23865	5.3357	5.75902
2004Q4	5.54227	5.40903	5.67493	6.23865	5.81572	6.0229	6.00921	5.85663	5.67671	5.42649	5.51585	5.79493	5.48657	5.38721	5.58821	5.29773	6.51605	6.005	6.10701	5.74568	5.83295	5.59954	5.37272	5.66368	5.63832	5.33381	5.49095	6.08592	6.17149	5.52985	5.81792	6.31169	5.55984	5.17408	5.80559	5.80626	6.29149	5.65329	5.52069	5.54675	5.26593	5.60017	5.91033	5.93242	5.89346	5.69714	5.2592	5.35841	5.77882
2005Q1	5.5561	5.42397	5.73498	6.28572	5.82794	6.04893	6.03904	5.91081	5.68867	5.43846	5.54385	5.81468	5.49357	5.39667	5.59349	5.3094	6.53723	6.05168	6.13415	5.75185	5.84984	5.6154	5.38043	5.68847	5.65324	5.33994	5.49887	6.11115	6.20329	5.55194	5.86067	6.33672	5.56788	5.18056	5.83901	5.82829	6.31341	5.67196	5.53832	5.5613	5.27352	5.61856	5.95182	5.96365	5.92617	5.71427	5.27783	5.38197	5.80237
2005Q2	5.57944	5.4464	5.83272	6.33985	5.84272	6.08176	6.07937	5.98001	5.70506	5.45151	5.58715	5.83918	5.50512	5.40967	5.61008	5.33029	6.56221	6.10764	6.1621	5.76211	5.87353	5.63338	5.40033	5.72817	5.66887	5.36794	5.51086	6.13696	6.24505	5.59329	5.9107	6.37128	5.57776	5.19746	5.88798	5.8628	6.35336	5.6915	5.55884	5.58142	5.28658	5.65099	6.00335	5.99711	5.97641	5.7351	5.3079	5.40777	5.83412
2005Q3	5.60057	5.46786	5.91459	6.3864	5.85808	6.11038	6.12417	6.04912	5.72441	5.46735	5.64291	5.86115	5.51931	5.42275	5.62839	5.35107	6.57958	6.1582	6.18593	5.77406	5.89409	5.65044	5.42215	5.75692	5.69225	5.39172	5.52417	6.16089	6.28242	5.63144	5.94799	6.40605	5.58927	5.21596	5.94121	5.89446	6.37561	5.71685	5.57167	5.60334	5.30365	5.68652	6.05097	6.03142	6.02003	5.75434	5.3411	5.44255	5.86478
2005Q4	5.61912	5.48108	5.97671	6.42753	5.86672	6.12905	6.14228	6.09742	5.73324	5.4736	5.68711	5.87703	5.52094	5.42794	5.62989	5.38194	6.58177	6.19674	6.1983	5.76621	5.90215	5.65966	5.44172	5.78835	5.71175	5.40288	5.52334	6.16978	6.31065	5.66133	5.98158	6.42763	5.58851	5.22593	5.98414	5.91462	6.38852	5.73486	5.5887	5.61864	5.31471	5.71803	6.07779	6.04993	6.06129	5.76156	5.35479	5.47244	5.88488
2006Q1	5.6396	5.49764	6.01494	6.45159	5.87006	6.14047	6.16466	6.13584	5.74174	5.47492	5.72319	5.88902	5.52032	5.4317	5.63859	5.41273	6.5827	6.22479	6.20545	5.75935	5.90316	5.6678	5.45824	5.81027	5.72675	5.40984	5.52465	6.17466	6.33138	5.68997	6.00465	6.44347	5.58628	5.23458	6.02268	5.93171	6.39791	5.75027	5.59123	5.63562	5.32831	5.75134	6.10279	6.06628	6.09626	5.768	5.37354	5.50346	5.90107
2006Q2	5.65615	5.51038	6.03715	6.46022	5.87505	6.14701	6.18338	6.15693	5.75146	5.48212	5.76374	5.89963	5.52073	5.44049	5.64439	5.43763	6.57379	6.24457	6.20718	5.74894	5.90371	5.67351	5.48735	5.83941	5.74367	5.43737	5.532	6.17283	6.34302	5.7253	6.00654	6.44983	5.58568	5.24915	6.05898	5.94501	6.40095	5.76802	5.60511	5.6537	5.34206	5.79464	6.11801	6.08926	6.13031	5.77088	5.37031	5.52946	5.91243
2006Q3	5.6747	5.52277	6.05049	6.46369	5.88344	6.15151	6.19496	6.17152	5.76541	5.48754	5.79022	5.91036	5.52785	5.45115	5.65187	5.46125	6.56955	6.25976	6.21312	5.74726	5.90955	5.68437	5.50909	5.86651	5.76343	5.44964	5.53732	6.17277	6.35093	5.75081	6.01562	6.45204	5.5868	5.25708	6.08667	5.95781	6.4007	5.78658	5.62178	5.66894	5.35904	5.83974	6.12757	6.09369	6.16083	5.77699	5.38483	5.56025	5.92367
2006Q4	5.69116	5.52946	6.05167	6.4533	5.88992	6.15322	6.2076	6.17344	5.7766	5.49371	5.8116	5.917	5.53488	5.46016	5.65893	5.4752	6.56612	6.26984	6.22365	5.74404	5.91476	5.69277	5.52372	5.88126	5.77759	5.45107	5.53972	6.17499	6.35269	5.77327	6.00613	6.46065	5.58736	5.26926	6.10395	5.96755	6.39419	5.80523	5.62521	5.68615	5.37182	5.87441	6.13846	6.10763	6.17962	5.7857	5.39881	5.5891	5.92976
2007Q1	5.69735	5.53894	6.04731	6.44179	5.89149	6.15744	6.2107	6.1649	5.78275	5.49913	5.82549	5.92078	5.53844	5.46581	5.66593	5.48486	6.55803	6.27337	6.22776	5.7316	5.91401	5.69523	5.53851	5.9019	5.79277	5.47468	5.54354	6.16687	6.35412	5.78876	5.9979	6.46422	5.58533	5.2827	6.11737	5.9746	6.39263	5.81215	5.6356	5.69515	5.3858	5.90276	6.14372	6.11509	6.19769	5.78769	5.40142	5.61095	5.93318
2007Q2	5.71242	5.54466	6.04279	6.42585	5.89448	6.15343	6.21949	6.15234	5.79119	5.50853	5.82942	5.92179	5.54343	5.47652	5.6724	5.49542	6.54827	6.27597	6.22927	5.72256	5.9104	5.70071	5.54036	5.91635	5.80517	5.48464	5.54853	6.16556	6.35001	5.79693	5.98007	6.46554	5.5845	5.28744	6.12757	5.98092	6.37998	5.82141	5.64552	5.70672	5.40081	5.92992	6.14477	6.11679	6.20973	5.7906	5.40073	5.63379	5.93471
2007Q3	5.71834	5.54561	6.02357	6.39078	5.89509	6.14969	6.21147	6.12736	5.79117	5.50782	5.83338	5.91814	5.54163	5.47622	5.67391	5.50375	6.5327	6.2631	6.22447	5.69833	5.89587	5.69975	5.54413	5.92537	5.81179	5.49219	5.54568	6.15514	6.34145	5.80153	5.95204	6.45392	5.57767	5.30284	6.12563	5.98013	6.36466	5.82605	5.65223	5.71155	5.40593	5.94461	6.13658	6.11728	6.21441	5.78834	5.40944	5.64743	5.92758
2007Q4	5.72215	5.5488	5.99841	6.34672	5.89395	6.14248	6.20697	6.09426	5.7898	5.5121	5.82991	5.91587	5.53922	5.47583	5.67989	5.50514	6.52582	6.25435	6.23169	5.68527	5.88585	5.69933	5.55238	5.9282	5.8155	5.4966	5.54611	6.14767	6.3325	5.80408	5.91688	6.45253	5.57263	5.30887	6.12606	5.98182	6.35242	5.83269	5.66156	5.71632	5.414	5.94651	6.12996	6.11232	6.21714	5.78885	5.4115	5.65432	5.91973
2008Q1	5.73058	5.54944	5.96508	6.29494	5.89566	6.13995	6.20329	6.05069	5.79041	5.52018	5.83241	5.91101	5.54959	5.48242	5.68386	5.50771	6.52151	6.24062	6.23312	5.68028	5.8857	5.69808	5.55443	5.94083	5.82401	5.51339	5.55324	6.14446	6.32637	5.8051	5.85691	6.45683	5.57731	5.31686	6.12236	5.98604	6.34051	5.83923	5.67184	5.72154	5.42238	5.94378	6.12724	6.1265	6.21519	5.79117	5.41346	5.65985	5.91358
2008Q2	5.72831	5.5449	5.914	6.21733	5.89356	6.124	6.1917	5.98558	5.78352	5.51665	5.81772	5.898	5.54578	5.47757	5.68869	5.50775	6.49628	6.21074	6.22627	5.65083	5.86505	5.69033	5.55061	5.93714	5.82646	5.51572	5.54492	6.12548	6.30284	5.79584	5.78704	6.44385	5.56806	5.32249	6.10526	5.97826	6.31109	5.83904	5.67425	5.7183	5.42423	5.93286	6.10066	6.1172	6.19881	5.78278	5.41702	5.66216	5.89286
2008Q3	5.72396	5.53707	5.84319	6.14388	5.87998	6.09635	6.17185	5.91616	5.76163	5.50792	5.7868	5.86812	5.53146	5.46811	5.67527	5.49866	6.47536	6.16944	6.20634	5.6156	5.84024	5.67863	5.53358	5.92061	5.81573	5.51668	5.53736	6.09519	6.27764	5.77393	5.68959	6.42098	5.54629	5.31712	6.07455	5.96472	6.26927	5.82567	5.67399	5.70585	5.42307	5.90276	6.0771	6.11098	6.1694	5.76747	5.40364	5.65651	5.86498
2008Q4	5.72452	5.53924	5.7973	6.10524	5.87684	6.08094	6.15236	5.85474	5.7489	5.51103	5.78283	5.85849	5.52489	5.46801	5.67677	5.49871	6.46842	6.15078	6.19161	5.5939	5.8275	5.67504	5.53701	5.92625	5.8106	5.52629	5.54273	6.08404	6.26165	5.76908	5.62866	6.40525	5.54277	5.31382	6.055	5.95948	6.24676	5.82163	5.67904	5.70825	5.42445	5.8943	6.06425	6.1077	6.1545	5.76386	5.39111	5.65448	5.85013
2009Q1	5.73358	5.55005	5.79595	6.09887	5.89053	6.08924	6.16468	5.87259	5.76969	5.52267	5.78773	5.85585	5.54346	5.4804	5.68542	5.51324	6.47012	6.14377	6.19891	5.61474	5.84316	5.68181	5.54362	5.9349	5.8234	5.53214	5.55033	6.08587	6.25933	5.77523	5.61958	6.41642	5.56157	5.33296	6.05286	5.96699	6.25291	5.83363	5.6897	5.71739	5.43884	5.88721	6.07102	6.10888	6.14962	5.76979	5.40668	5.65827	5.85933
2009Q2	5.72716	5.53748	5.73415	6.05738	5.87963	6.06518	6.13598	5.82879	5.75093	5.51804	5.76335	5.83443	5.5303	5.47633	5.68154	5.50812	6.45176	6.11091	6.18769	5.58618	5.824	5.6728	5.53801	5.92291	5.81086	5.52814	5.54596	6.06506	6.23319	5.75481	5.56134	6.40021	5.5441	5.32598	6.01705	5.95787	6.21994	5.82773	5.68724	5.70954	5.43171	5.85617	6.04884	6.09891	6.11068	5.76042	5.39993	5.65204	5.83806
2009Q3	5.70394	5.52325	5.67959	6.03348	5.85872	6.03908	6.11323	5.77366	5.70818	5.51108	5.71196	5.80138	5.51246	5.46795	5.66943	5.49543	6.43593	6.08113	6.16281	5.54179	5.78208	5.65042	5.51859	5.89831	5.78729	5.53041	5.5369	6.03388	6.20736	5.73253	5.49455	6.37842	5.52429	5.32027	5.98126	5.94007	6.19298	5.7987	5.67408	5.68808	5.422	5.80941	6.02602	6.09248	6.07372	5.73722	5.38108	5.63161	5.81168
2009Q4	5.69558	5.51702	5.63693	6.03113	5.85004	6.02728	6.09778	5.73855	5.68646	5.50748	5.68854	5.78572	5.5074	5.46339	5.66556	5.49277	6.43002	6.06076	6.14465	5.51197	5.75942	5.63983	5.51038	5.887	5.77109	5.53984	5.53484	6.02119	6.1943	5.72157	5.44958	6.36362	5.51668	5.31967	5.95556	5.93173	6.18331	5.78154	5.6689	5.6743	5.41841	5.79046	6.01387	6.08383	6.05704	5.72969	5.37372	5.62042	5.79813
2010Q1	5.68715	5.50689	5.61481	6.0302	5.84191	6.01902	6.09284	5.72221	5.66833	5.50198	5.65987	5.77252	5.49878	5.45687	5.65963	5.48687	6.42742	6.05633	6.13987	5.49884	5.74619	5.63411	5.50174	5.86792	5.75702	5.53997	5.52579	6.01323	6.19061	5.71925	5.41758	6.35662	5.51011	5.3156	5.94674	5.92511	6.16779	5.77117	5.66338	5.66733	5.41575	5.77705	6.0051	6.08258	6.04337	5.71935	5.37313	5.61214	5.79036
2010Q2	5.67499	5.51038	5.59222	6.03266	5.83797	6.01665	6.08948	5.70506	5.65982	5.50745	5.65505	5.77093	5.5027	5.46064	5.66187	5.48304	6.43061	6.05337	6.13826	5.49377	5.74898	5.63592	5.49549	5.86456	5.75629	5.53479	5.53419	6.01351	6.19094	5.71097	5.39332	6.35693	5.50913	5.31602	5.93662	5.92533	6.16907	5.76402	5.66499	5.66789	5.41657	5.77304	6.00384	6.08688	6.0386	5.72151	5.38068	5.61158	5.7874
2010Q3	5.68694	5.51214	5.5832	6.03341	5.84651	6.02637	6.09031	5.70958	5.66535	5.51461	5.64509	5.77706	5.51242	5.46879	5.67229	5.49643	6.43532	6.05778	6.14812	5.50567	5.76635	5.64116	5.50132	5.87873	5.75817	5.54846	5.54267	6.02441	6.19555	5.71137	5.39203	6.37354	5.51769	5.32495	5.93224	5.93693	6.1791	5.7737	5.67927	5.67636	5.42096	5.77825	6.01051	6.08671	6.03385	5.72789	5.38483	5.61494	5.79367
2010Q4	5.67207	5.50205	5.54479	6.01661	5.83642	6.01679	6.07401	5.67945	5.63931	5.51297	5.61059	5.76433	5.50485	5.46485	5.66772	5.48854	6.42902	6.04519	6.14254	5.4921	5.74373	5.62933	5.49008	5.8702	5.74708	5.55638	5.53522	6.01014	6.18712	5.69725	5.35058	6.3648	5.50754	5.31702	5.90892	5.92913	6.1644	5.75878	5.67794	5.66691	5.41529	5.76374	6.00045	6.08705	6.01085	5.71677	5.38471	5.61382	5.77981
2011Q1	5.65111	5.49257	5.4961	5.98962	5.81829	5.99809	6.05091	5.64189	5.60787	5.50628	5.56479	5.73463	5.4913	5.45289	5.65643	5.47814	6.41802	6.02039	6.12518	5.46102	5.70959	5.61063	5.47428	5.84108	5.73092	5.56657	5.53131	5.98842	6.16632	5.67505	5.29476	6.34974	5.48363	5.3026	5.87497	5.91485	6.14424	5.73752	5.67367	5.64974	5.40502	5.72036	5.98435	6.0825	5.98297	5.69949	5.37476	5.60411	5.7585
2011Q2	5.64305	5.48862	5.46089	5.9799	5.81141	5.98838	6.02767	5.62319	5.57891	5.50286	5.5381	5.72697	5.48609	5.44163	5.65361	5.47909	6.41426	6.01156	6.12008	5.45636	5.69867	5.60467	5.48004	5.84384	5.71815	5.58023	5.52925	5.98106	6.15485	5.66538	5.23998	6.3429	5.47709	5.30657	5.85615	5.91005	6.12783	5.72436	5.6716	5.63981	5.39946	5.71592	5.9786	6.07386	5.96635	5.69192	5.35308	5.58962	5.74822
2011Q3	5.64871	5.49476	5.46016	5.97711	5.81415	5.98954	6.01835	5.62191	5.57839	5.51195	5.54865	5.72664	5.49275	5.45288	5.65719	5.47849	6.41708	6.01488	6.12586	5.46809	5.70318	5.60908	5.48218	5.84366	5.71851	5.58609	5.53647	5.98461	6.15004	5.66442	5.22716	6.341	5.48204	5.30171	5.85715	5.90884	6.12464	5.72571	5.67853	5.64637	5.4071	5.72598	5.98159	6.08051	5.964	5.69498	5.37093	5.60891	5.75055
2011Q4	5.65002	5.4984	5.46773	5.96833	5.81541	5.98649	6.02527	5.62058	5.56618	5.51303	5.55441	5.72072	5.49302	5.45493	5.65679	5.48517	6.41267	6.01565	6.12476	5.46439	5.70238	5.60948	5.48709	5.84528	5.71571	5.59673	5.5415	5.98171	6.14389	5.66182	5.21628	6.3425	5.47941	5.31078	5.85855	5.90765	6.11785	5.72887	5.67894	5.64639	5.40889	5.72009	5.98376	6.08713	5.95928	5.69396	5.37165	5.60343	5.749
2012Q1	5.64782	5.50002	5.47248	5.96668	5.82051	5.97757	6.01845	5.61287	5.5502	5.51651	5.56101	5.71692	5.49323	5.45565	5.66025	5.48592	6.41171	6.00978	6.12041	5.45775	5.69732	5.60946	5.48411	5.85306	5.71025	5.60612	5.54368	5.97329	6.13505	5.64843	5.21018	6.33437	5.47715	5.31806	5.85244	5.903	6.10909	5.72006	5.68383	5.64359	5.41477	5.72642	5.9813	6.08492	5.95299	5.69194	5.3622	5.60791	5.74668
2012Q2	5.64592	5.49091	5.50085	5.9723	5.8312	5.97587	6.0024	5.61721	5.54669	5.51931	5.56079	5.71372	5.49509	5.45525	5.66353	5.49365	6.41477	6.00708	6.11721	5.4625	5.69834	5.60792	5.4816	5.85584	5.70466	5.62928	5.54556	5.97224	6.12866	5.64771	5.2248	6.33033	5.47802	5.31828	5.85295	5.90309	6.1036	5.72206	5.69055	5.64591	5.42309	5.73296	5.97876	6.08394	5.95126	5.69091	5.36997	5.61076	5.74837
2012Q3	5.64553	5.50119	5.52295	5.98477	5.835	5.97078	6.01329	5.61945	5.54357	5.52263	5.56626	5.71375	5.496	5.45462	5.66385	5.50301	6.41686	6.00633	6.11207	5.46734	5.70208	5.6053	5.48383	5.86129	5.70657	5.65063	5.54786	5.97121	6.12852	5.64868	5.22758	6.33375	5.47688	5.32276	5.86064	5.90371	6.10001	5.7224	5.6911	5.64593	5.42548	5.74139	5.98192	6.08655	5.95981	5.69065	5.37507	5.61901	5.75188
2012Q4	5.63871	5.50048	5.54179	5.99874	5.83944	5.9625	6.00332	5.62165	5.5428	5.52497	5.57188	5.7089	5.49262	5.4524	5.66242	5.5003	6.41607	6.00231	6.10785	5.47036	5.70376	5.60349	5.47217	5.86799	5.70313	5.67403	5.5499	5.96693	6.12117	5.64519	5.23994	6.32947	5.46908	5.32265	5.86766	5.90078	6.0909	5.71264	5.70352	5.64639	5.43006	5.74797	5.97825	6.08853	5.9644	5.68666	5.36948	5.62434	5.75288

## Sheet: housing investment
Privately Owned Housing Starts Authorized by Building Permits in units - 1 unit structures - seasonally adjusted (in logs)
	AL	AR	AZ	CA	CO	CT	DE	FL	GA	IA	ID	IL	IN	KS	KY	LA	MA	MD	ME	MI	MN	MO	MS	MT	NC	ND	NE	NH	NJ	NM	NV	NY	OH	OK	OR	PA	RI	SC	SD	TN	TX	UT	VA	VT	WA	WI	WV	WY	US
	inv1	inv2	inv3	inv4	inv5	inv6	inv7	inv8	inv9	inv10	inv11	inv12	inv13	inv14	inv15	inv16	inv17	inv18	inv19	inv20	inv21	inv22	inv23	inv24	inv25	inv26	inv27	inv28	inv29	inv30	inv31	inv32	inv33	inv34	inv35	inv36	inv37	inv38	inv39	inv40	inv41	inv42	inv43	inv44	inv45	inv46	inv47	inv48	inv49
1988Q1	6.632	5.8796	7.60937	9.36936	6.63332	7.17651	6.10925	9.08678	8.17705	5.62882	5.42935	7.76726	7.28688	6.29772	6.52013	6.03548	7.55276	7.92781	6.36876	7.69758	7.30944	7.18488	6.02506	3.64632	8.04932	3.56483	5.54518	6.7338	8.00825	6.22125	6.88038	8.03204	7.58443	5.74086	6.53814	8.32142	5.75995	7.13807	4.46591	7.43426	7.94744	6.07764	8.23854	5.64072	7.44288	7.00307	4.6217	3.58352	11.2858
1988Q2	6.71942	6.04579	7.62706	9.45316	6.71659	7.14677	6.2106	9.13755	8.2623	5.98394	5.48203	7.9363	7.41337	6.40136	6.63463	6.13412	7.4493	8.01036	6.27162	7.83847	7.4793	7.25016	5.94105	3.86423	8.10148	4.39856	5.61069	6.44572	8.00269	6.09882	6.82618	8.03539	7.79798	5.84161	6.57879	8.26659	5.75151	7.22135	4.51816	7.52582	7.99092	6.191	8.32134	5.76205	7.44249	7.10195	4.63473	3.75342	11.3426
1988Q3	6.65028	5.95238	7.54961	9.51151	6.70401	7.00639	6.14275	9.1407	8.20184	5.9772	5.38296	7.94591	7.38771	6.40743	6.62628	6.00553	7.38129	8.07257	6.2519	7.84672	7.374	7.22451	5.9162	3.82864	8.0684	4.21459	5.64309	6.33918	7.98945	6.0898	7.12689	7.95038	7.79565	5.80413	6.61428	8.21428	5.70489	7.21842	4.56781	7.41035	7.99114	6.11589	8.34546	5.75995	7.50842	7.13728	4.61181	3.91202	11.3392
1988Q4	6.632	6.0194	7.4909	9.60454	6.63156	6.75305	6.27539	9.1447	8.14516	5.96101	5.49306	7.99766	7.40001	6.44942	6.64249	6.06301	7.3458	8.00292	6.04816	7.84646	7.46279	7.25912	6.00553	3.80666	8.10682	4.25325	5.80312	6.30323	7.71661	6.11073	7.04839	7.95543	7.72253	5.89624	6.6925	8.21636	5.62522	7.24423	4.41482	7.39858	8.06453	6.16402	8.33135	5.72576	7.56182	7.18741	4.69135	3.65498	11.3343
1989Q1	6.49929	5.79606	7.40712	9.49444	6.63463	6.76504	6.04422	9.16646	8.05579	5.9831	5.34233	7.82471	7.32559	6.24675	6.55298	6.11147	7.25418	7.87309	6.16261	7.82525	7.22911	7.04839	5.88239	3.56483	7.97178	4.19469	5.6478	6.11221	7.56717	5.96358	7.30564	7.90728	7.71646	5.90081	6.69126	8.09803	5.60458	7.14335	4.10539	7.39838	8.02005	6.09282	8.25079	5.62402	7.53387	6.99179	4.66029	3.28341	11.2703
1989Q2	6.53814	5.97041	7.41176	9.48838	6.58156	6.51274	5.88146	9.10309	7.9652	6.03708	5.70711	7.78794	7.37275	6.2928	6.54774	6.01859	7.12017	7.86544	6.06611	7.82897	7.35458	7.11015	5.90172	3.82864	7.98048	4.03719	5.80914	6.17309	7.80425	6.06611	7.03262	7.91608	7.69166	5.90172	6.81014	8.11751	5.46242	7.08702	4.58836	7.31699	7.99092	6.11516	8.22506	5.63717	7.6225	7.12662	4.59175	3.74557	11.2627
1989Q3	6.46873	5.94542	7.44678	9.50338	6.65673	6.41017	6.08146	9.03773	8.0253	6.04895	5.792	7.81413	7.41858	6.31837	6.62495	5.96956	7.02909	7.96253	6.02102	7.87563	7.38812	7.05531	5.96956	3.7612	8.00626	4.16925	5.76205	6.00141	7.6446	5.98729	7.22062	7.75076	7.76415	5.89072	6.84339	8.04612	5.39967	7.11178	4.50719	7.42814	8.00403	6.2239	8.09834	5.38755	7.67431	7.13754	4.60517	3.89182	11.2579
1989Q4	6.55441	5.96272	7.40631	9.58779	6.66143	6.45047	5.9567	9.04468	7.96809	6.02264	5.80413	7.81561	7.38502	6.39359	6.61114	6.07381	6.96477	7.79606	5.97889	7.87017	7.3533	7.15409	5.82796	3.84303	7.98741	4.15888	5.65015	5.97381	7.69333	6.06997	7.29483	7.67183	7.72607	5.91889	6.96351	8.01058	5.49443	7.04868	4.78192	7.41115	8.02573	6.14132	8.06924	5.49717	7.81467	7.1788	4.67904	3.77659	11.2595
1990Q1	6.55914	6.14989	7.43169	9.4151	6.69703	6.30567	6.05052	8.98565	8.00958	6.28227	5.92336	7.9525	7.50842	6.28289	6.75848	6.07535	7.05646	7.89133	6.00717	7.90125	7.45742	7.10277	5.83286	3.8986	8.02464	4.12174	5.93666	5.75785	7.5168	6.08298	7.21131	7.73514	7.90618	5.9162	7.08339	8.02835	5.48894	7.19394	5.0689	7.46011	8.03149	6.25383	8.07236	5.45532	7.92117	7.27194	4.89535	3.80666	11.2673
1990Q2	6.44783	6.02667	7.42853	9.12718	6.72383	6.12322	5.98729	8.85381	7.96218	6.11368	5.92068	7.75961	7.40752	6.26846	6.60349	6.07074	6.85996	7.70195	5.70156	7.85671	7.33975	6.98687	5.90989	4.03719	7.92262	4.14313	5.73657	5.6058	7.05359	6.11663	7.13063	7.4985	7.79001	5.85316	7.03174	7.89307	5.27981	7.19544	4.61512	7.35862	8.08251	6.26593	7.85309	5.12198	7.75176	7.18942	4.70048	3.86423	11.1256
1990Q3	6.46251	5.94803	7.32383	8.97664	6.76157	6.08374	5.76519	8.798	7.90236	6.07381	5.88053	7.69013	7.39919	6.21727	6.51521	6.12103	6.74641	7.5108	5.63121	7.76514	7.37233	6.99118	5.78383	4.11087	7.85244	4.15888	5.77455	5.56068	6.84019	6.12249	7.11721	7.45163	7.72474	5.89072	6.98564	7.7215	5.14555	7.13356	4.63796	7.24898	8.00759	6.28724	7.79262	5.15136	7.68079	7.15044	4.73912	3.59274	11.0502
1990Q4	6.4531	5.85889	7.19893	8.68197	6.75266	6.02667	5.64191	8.69406	7.8048	5.98226	5.95238	7.51298	7.27886	6.1605	6.35842	6.10107	6.6754	7.55136	5.60458	7.59622	7.20241	6.80351	5.72902	4.06044	7.7509	4.1325	5.71812	5.41462	6.80977	5.918	6.90073	7.39715	7.52726	5.87493	6.76542	7.69591	5.33754	7.03995	4.54683	7.11097	7.99069	6.24546	7.58121	4.98816	7.44425	7.08451	4.89285	3.68051	10.9112
1991Q1	6.3613	5.84644	7.3192	8.70616	6.79682	5.9287	5.68471	8.61951	7.89307	5.98813	5.95756	7.42536	7.27425	6.00635	6.38351	6.08146	6.57647	7.42893	5.38296	7.5824	7.32822	6.7468	5.60703	4.20966	7.73791	4.08877	5.706	5.28995	6.72982	5.98729	6.9014	7.22936	7.55189	5.90445	6.72263	7.65239	4.96981	6.97728	4.70351	7.13595	7.9735	6.35089	7.60124	4.59512	7.48418	7.0079	4.64759	3.61989	10.9009
1991Q2	6.49577	5.99976	7.48005	8.78345	6.96003	6.23767	5.79606	8.75647	7.9623	6.20321	6.14275	7.71705	7.45453	6.286	6.63463	6.27099	6.82979	7.50696	5.66527	7.82097	7.34837	7.07665	5.83773	4.27203	7.97671	4.21951	5.90445	5.52279	7.03439	6.01372	7.27147	7.5778	7.78211	6.11368	6.86241	7.88043	5.17991	7.09562	4.84419	7.49016	8.12385	6.51026	7.85218	5.05837	7.68922	7.21598	4.87265	3.57422	11.0835
1991Q3	6.57925	6.14347	7.56924	8.74762	6.96256	6.26973	5.77765	8.70737	8.0161	6.34739	6.16822	7.71898	7.49517	6.34681	6.6695	6.39192	6.93245	7.60738	5.57595	7.82325	7.29302	7.11015	5.8309	4.40672	7.97155	4.37366	5.95842	5.38907	7.07975	6.08677	6.86276	7.53814	7.7842	6.15415	6.91771	7.88983	5.33593	7.1642	4.94639	7.35649	8.20184	6.52062	7.83939	5.02607	7.69379	7.21573	4.90774	4.04888	11.0926
1991Q4	6.59122	6.04658	7.56424	8.69042	7.07862	6.1605	5.8181	8.75211	8.00425	6.38912	6.19032	7.63192	7.45645	6.38182	6.69167	6.44041	6.91804	7.56528	5.64897	7.7842	7.31942	6.99973	5.9108	4.59848	8.04505	4.41078	5.9287	5.48894	7.15175	6.19372	7.30743	7.50934	7.76613	6.19916	7.07044	7.9112	5.18365	7.08311	4.81218	7.36116	8.22844	6.62362	7.85386	4.90774	7.71378	7.21867	4.89285	4.04888	11.0904
1992Q1	6.72543	6.1591	7.74327	8.74809	7.35116	6.36532	5.85793	8.81255	8.1833	6.68544	6.46199	7.91328	7.74008	6.5662	6.87109	6.50179	7.08423	7.79111	5.74939	7.92299	7.62413	7.33433	6.03149	4.97213	8.25462	5.12198	6.18552	5.5658	7.22232	6.20725	7.0533	7.61645	7.9439	6.38294	6.96948	8.02038	5.34074	7.22184	5.36909	7.58325	8.36482	6.75732	7.96774	4.92725	7.84202	7.52492	4.98132	4.33947	11.2482
1992Q2	6.71296	6.17656	7.68095	8.80287	7.33672	6.46199	5.79909	8.86719	8.16052	6.33624	6.40247	7.82883	7.64124	6.5216	6.78784	6.6174	7.11748	8.05452	5.65249	7.92045	7.44503	7.25724	6.02828	4.77351	8.09803	4.70652	6.04501	5.62281	6.96224	6.26973	6.90039	7.4868	7.91486	6.29711	6.99393	7.96913	5.1911	7.19744	5.07309	7.47553	8.34506	6.89972	7.96288	5.03044	7.8003	7.40712	4.94639	4.16408	11.2206
1992Q3	6.74406	6.24157	7.82285	8.69774	7.44522	6.39192	6.00881	8.81661	8.18032	6.40081	6.39248	7.89208	7.65523	6.46563	6.85048	6.5976	7.13648	7.55834	5.62882	7.93975	7.51788	7.27771	6.02183	4.92725	8.17085	4.6085	6.03787	5.62161	6.91142	6.29772	7.01959	7.54239	7.9407	6.38576	7.05214	7.96867	5.23821	7.23945	4.96284	7.5701	8.40805	6.96035	7.99024	5.03261	7.80125	7.41918	4.9927	4.1795	11.2262
1992Q4	6.82546	6.36418	7.89593	8.80707	7.58815	6.49375	5.82895	8.94811	8.22407	6.39859	6.52893	7.8803	7.68846	6.49527	6.92166	6.7093	7.15592	7.64396	5.77662	7.89977	7.55171	7.31942	6.07228	4.99496	8.18386	4.58836	6.01127	5.69597	6.87695	6.38632	7.11504	7.55433	8.01091	6.42703	7.10195	8.05463	5.30662	7.24732	5.23111	7.67167	8.48632	6.98841	8.03496	5.05412	7.82671	7.5353	5.17615	4.29955	11.2778
1993Q1	6.79571	6.30262	7.79152	8.71084	7.56251	6.54774	5.87493	8.92528	8.22497	6.40357	6.37616	7.92901	7.68018	6.38069	6.91837	6.71093	7.10524	7.6508	5.6058	7.90125	7.55451	7.22111	6.22059	4.65078	8.22076	4.91998	6.05522	5.7225	6.93731	6.29095	7.20539	7.46775	7.96947	6.38912	7.08227	8.07091	5.39363	7.26029	5.06048	7.67956	8.4296	6.90875	8.08979	5.0689	7.70256	7.47553	5.03479	4.24372	11.2601
1993Q2	6.80609	6.32257	7.89146	8.66383	7.55834	6.43828	5.9831	8.96967	8.27665	6.46147	6.49173	7.91559	7.68998	6.53572	6.86241	6.62451	7.17727	7.6656	5.60335	7.86147	7.50071	7.27656	6.20859	4.98589	8.22237	4.84419	6.12395	5.49031	7.09119	6.43455	7.32625	7.53601	7.94201	6.44095	7.1554	8.01555	5.26442	7.19544	5.10796	7.73003	8.45716	7.13409	8.0597	4.89784	7.78058	7.39265	5.09579	4.34813	11.2756
1993Q3	6.88278	6.34856	7.99339	8.65242	7.67833	6.53766	5.99894	8.99995	8.37586	6.49375	6.5811	7.97396	7.71943	6.62407	7.00003	6.74484	7.22815	7.73558	5.6336	7.98526	7.53352	7.33845	6.2928	5.15714	8.2707	4.78749	6.10032	5.65483	7.26543	6.53233	7.5009	7.52994	8.02432	6.5648	7.15096	8.06138	5.27641	7.29143	5.10595	7.81776	8.56471	7.30339	8.13163	4.98361	7.89556	7.49369	5.30165	4.56087	11.3505
1993Q4	6.98533	6.43882	8.14245	8.72084	7.77654	6.53282	5.91889	9.09833	8.46625	6.61114	6.72343	8.12681	7.82004	6.77651	7.00639	6.8171	7.2912	7.78752	5.84932	8.11103	7.63369	7.54044	6.47338	5.12198	8.43483	4.77912	6.18758	5.66873	7.49573	6.56386	7.50145	7.60207	8.037	6.56386	7.2172	8.12947	5.32949	7.3696	5.20584	7.89866	8.63557	7.35713	8.2002	5.0876	7.96855	7.63369	5.17803	4.60183	11.4344
1994Q1	7.07355	6.59396	8.21284	8.80382	7.88671	6.32197	5.92336	9.06161	8.45383	6.4552	6.69745	8.04698	7.76698	6.79533	6.99271	6.98964	7.14045	7.62852	5.67103	8.01753	7.51643	7.48978	6.59533	5.28658	8.31654	4.48864	6.04737	5.73657	7.41236	6.74445	7.60738	7.26753	8.02835	6.64639	7.25794	7.80466	5.21312	7.44249	5.28658	7.78683	8.75542	7.31433	8.09651	4.91754	7.97499	7.45375	5.49443	5.0814	11.4142
1994Q2	7.14362	6.5976	8.1806	8.78809	7.81197	6.57601	5.96272	8.9747	8.4722	6.56855	6.60168	8.09661	7.77093	6.72062	7.0727	6.89501	7.24375	7.65886	5.8861	8.07132	7.52923	7.44833	6.53669	5.2832	8.35475	4.92967	6.1717	5.89164	7.59253	6.65758	7.60523	7.56562	8.02987	6.53185	7.19569	8.10057	5.28658	7.44795	5.2832	7.80914	8.71517	7.18235	8.1588	5.18739	7.92383	7.55294	5.61191	4.93207	11.4228
1994Q3	6.96979	6.41182	8.07786	8.7456	7.73456	6.54965	6.03309	9.00961	8.3777	6.41564	6.48107	8.0708	7.74399	6.66823	7.04925	6.85681	7.26193	7.65886	6.01372	8.02595	7.47779	7.40184	6.50728	5.0626	8.31996	4.84156	6.07304	5.8768	7.52672	6.61204	7.49239	7.59253	7.97728	6.388	7.18134	8.06201	5.30827	7.38212	5.29665	7.72739	8.63034	7.04083	8.1043	5.22036	7.89083	7.49702	5.63121	4.83892	11.3792
1994Q4	6.97666	6.40357	8.12908	8.72008	7.68861	6.50329	5.91979	8.9015	8.44684	6.39192	6.34739	8.02082	7.71542	6.62848	7.04781	6.84694	7.25158	7.62201	5.83773	8.04173	7.42018	7.35116	6.49274	5.05625	8.31801	4.96284	6.00059	5.8387	7.54451	6.57042	7.51244	7.53245	7.95027	6.36704	7.15929	8.01224	5.26096	7.3352	5.19481	7.81292	8.65032	7.00911	8.00046	5.11799	7.7347	7.47609	5.68923	4.77632	11.3498
1995Q1	6.92658	6.31716	7.98162	8.58392	7.67663	6.41127	5.79403	8.85623	8.40208	6.30749	6.33683	7.95085	7.64795	6.53669	6.89298	6.79645	7.1554	7.59119	5.71593	7.97648	7.26496	7.28184	6.34036	5.00395	8.28223	4.6944	5.83286	5.77971	7.27702	6.55298	7.42873	7.44911	7.81763	6.32615	7.11883	7.84828	5.11399	7.36412	5.21312	7.70646	8.56947	7.11666	7.95543	5.13384	7.71289	7.40184	5.55296	4.58497	11.2739
1995Q2	6.91771	6.38407	8.10188	8.59193	7.6854	6.34622	5.87212	8.8125	8.47094	6.33565	6.39749	7.93654	7.66856	6.51323	6.86936	6.79906	7.05675	7.50255	5.87493	8.02661	7.3656	7.24447	6.38407	4.98589	8.22827	4.72147	5.89807	5.74833	7.26892	6.58984	7.53441	7.44736	7.87398	6.38294	7.14756	7.82391	5.13384	7.34794	5.22575	7.71928	8.60012	7.06162	7.85179	5.03695	7.72386	7.42098	5.49717	4.54329	11.2773
1995Q3	7.00639	6.37956	8.16565	8.7222	7.84097	6.4552	5.90081	8.95541	8.55552	6.44519	6.5774	8.01191	7.794	6.70768	7.00941	6.90039	7.05904	7.54996	5.78792	8.06558	7.53334	7.37942	6.47697	5.02169	8.35303	4.75359	6.13845	5.77559	7.2659	6.57786	7.51843	7.3815	7.91523	6.51816	7.16678	7.88858	5.15522	7.43051	5.20584	7.86902	8.7126	7.20539	8.02399	5.02826	7.67338	7.46241	5.60825	4.72147	11.3687
1995Q4	7.10085	6.53717	8.18887	8.73037	7.91851	6.49577	5.94542	8.83879	8.56915	6.43026	6.54631	8.01994	7.85231	6.68586	7.05675	6.91473	7.07468	7.61448	5.88146	8.12326	7.56941	7.37672	6.45625	5.03911	8.35992	4.72739	6.13988	5.7214	7.2086	6.63682	7.62868	7.4495	7.93116	6.64336	7.25771	7.84737	5.08347	7.38998	5.40867	7.85386	8.77498	7.28001	8.04163	5.21312	7.87512	7.47477	5.59471	4.85203	11.3887
1996Q1	7.14151	6.56386	8.21609	8.72372	7.84018	6.35495	5.86741	8.90468	8.60612	6.56573	6.49375	8.04238	7.87144	6.73181	6.94986	7.03995	7.0533	7.50769	5.81314	8.1332	7.46851	7.50182	6.60349	4.82297	8.35177	4.53974	6.21926	5.61556	7.30092	6.57879	7.63948	7.39511	7.97968	6.62495	7.28253	7.74644	5.1019	7.48249	5.32138	7.84463	8.88244	7.22111	7.93164	5.22754	7.88833	7.49832	5.54648	5.06048	11.4057
1996Q2	7.05272	6.51471	8.17592	8.72497	7.9145	6.5976	5.9567	8.93665	8.64071	6.54055	6.57925	8.03916	7.85127	6.75032	7.08059	6.99668	7.15201	7.58984	5.94367	8.14931	7.56164	7.38626	6.52893	4.93447	8.43966	4.76786	6.24417	5.88518	7.32778	6.59715	7.61858	7.45491	8.04377	6.54774	7.24803	7.93045	5.18925	7.54133	5.38755	7.90384	8.84352	7.19818	8.05123	5.07309	7.82857	7.54221	5.58099	4.89035	11.4248
1996Q3	7.04345	6.50529	8.12721	8.75	7.77835	6.52796	5.86741	8.92012	8.53543	6.52062	6.58341	8.03657	7.86698	6.67582	7.04636	6.94377	7.14125	7.52312	5.94192	8.16953	7.48005	7.36813	6.47749	4.92484	8.37571	4.9102	6.10554	5.86174	7.42178	6.58893	7.62641	7.47798	8.03668	6.53669	7.23346	7.88708	5.14555	7.47041	5.4161	7.7705	8.78875	7.20786	7.99957	4.99946	7.77975	7.54768	5.49443	4.77351	11.3932
1996Q4	7.04054	6.36819	8.10127	8.70118	7.81642	6.46303	5.82895	8.94002	8.53811	6.41455	6.40963	7.96832	7.80262	6.65887	7.00609	6.95718	7.10277	7.48848	5.82305	8.10571	7.34558	7.31611	6.51471	4.59512	8.35898	4.41482	6.11883	5.80714	7.4526	6.66738	7.46317	7.40021	7.90495	6.46043	7.22402	7.82578	5.15906	7.58731	5.13187	7.80547	8.77745	7.12823	7.96555	5.05199	7.74601	7.40509	5.64309	4.73912	11.3592
1997Q1	7.02613	6.38125	8.16498	8.81522	7.8657	6.5391	5.85793	8.92083	8.48866	6.19441	6.48514	7.8607	7.73032	6.59896	6.99912	6.91473	7.1864	7.48137	5.81214	8.07827	7.38212	7.25276	6.40963	4.76502	8.41235	4.33947	6.07764	5.85316	7.45684	6.62628	7.52851	7.33084	7.85813	6.5216	7.25794	7.90076	5.35028	7.51915	5.00171	7.79097	8.71188	7.14703	8.01895	4.79027	7.72002	7.34902	5.50533	4.55036	11.3577
1997Q2	7.0285	6.34388	8.13632	8.79573	7.86774	6.48971	5.84258	8.91373	8.50822	6.61428	6.51767	7.92516	7.77121	6.67034	7.16033	7.00094	7.14098	7.45722	5.80312	8.08096	7.40306	7.32975	6.49828	4.75359	8.46407	4.46973	6.16331	5.86174	7.43799	6.54391	7.56337	7.41518	7.89444	6.49173	7.27008	7.82138	5.14943	7.51098	5.33433	7.82138	8.79083	7.14256	7.98492	4.8701	7.79907	7.39593	5.51208	4.67283	11.3759
1997Q3	7.0285	6.33209	8.25357	8.85623	7.89494	6.57879	5.82305	8.87766	8.52714	6.46095	6.5935	7.93427	7.77149	6.5935	7.12983	6.95081	7.1642	7.50659	5.8944	8.10137	7.41417	7.30295	6.51866	4.84156	8.4269	4.39856	6.1591	5.86268	7.41397	6.49072	7.60572	7.44386	7.92299	6.49173	7.21475	7.86314	5.24351	7.49998	5.29163	7.78697	8.84352	7.10414	8.01797	5.08965	7.84672	7.38647	5.4539	4.72443	11.3899
1997Q4	7.00094	6.36819	8.24091	8.90919	7.86263	6.54247	5.87867	8.97466	8.537	6.45362	6.632	7.87917	7.78267	6.68877	7.15201	7.01451	7.17038	7.47458	5.90989	8.08538	7.48736	7.26566	6.45938	4.55036	8.44577	4.41078	6.17656	5.96358	7.46375	6.56339	7.53779	7.43011	7.99385	6.56103	7.16266	7.88946	5.27471	7.52905	5.39211	7.78835	8.87211	7.10497	8.01323	4.93926	7.89108	7.41377	5.43953	4.71552	11.4122
1998Q1	7.03439	6.39248	8.23907	8.86244	7.92117	6.69084	5.85507	8.94311	8.59069	6.50329	6.64509	7.97178	7.87068	6.70319	7.21769	6.94954	7.28093	7.46813	5.95842	8.18619	7.49109	7.28139	6.47953	4.79579	8.48721	4.83098	6.16682	6.02828	7.58291	6.49022	7.61923	7.53369	8.04644	6.58847	7.24304	7.95764	5.34233	7.50329	5.26269	7.79798	8.93849	7.10085	8.03171	5.14555	7.85838	7.50035	5.44961	4.72443	11.4437
1998Q2	7.11178	6.48464	8.31385	8.92559	7.97407	6.66015	5.92604	8.98026	8.61147	6.5615	6.65458	8.01874	7.84672	6.77916	7.15096	7.03027	7.19369	7.55346	5.9428	8.1608	7.53885	7.40387	6.63463	4.76217	8.51946	4.83892	6.27664	6.03149	7.58121	6.70645	7.67214	7.54186	8.00492	6.72743	7.20192	7.89469	5.28827	7.54151	5.41906	7.84162	8.98724	7.11639	8.02671	5.05625	7.87449	7.46642	5.53471	4.80129	11.4727
1998Q3	7.11694	6.38912	8.31915	8.98986	7.98219	6.68253	6.07611	9.02898	8.69935	6.62274	6.69827	7.9674	7.86544	6.72543	7.24803	7.01989	7.16498	7.69105	5.98478	8.14806	7.59455	7.40873	6.59851	4.78471	8.60441	4.92484	6.27351	6.01859	7.58104	6.68002	7.5566	7.48997	8.014	6.70808	7.27494	7.95507	5.30496	7.6398	5.43663	7.84997	9.0336	7.097	8.15823	5.03911	7.82804	7.51607	5.5835	4.80947	11.5041
1998Q4	7.17702	6.42433	8.41516	8.99434	8.08395	6.70686	5.97211	9.03062	8.76317	6.81088	6.73499	8.06872	7.96751	6.84162	7.35564	7.1036	7.22742	7.52797	6.16822	8.31353	7.73105	7.48978	6.69909	4.96981	8.66337	5.43518	6.27602	6.09206	7.62168	6.73855	7.6256	7.5994	8.15393	6.76119	7.25724	7.9774	5.40867	7.7178	5.62642	7.88758	9.05998	7.11124	8.20604	5.15329	7.7962	7.61809	5.5658	4.76502	11.5639
1999Q1	7.15981	6.46977	8.4288	9.00594	8.05664	6.733	6.08829	9.06377	8.7077	6.7886	6.66058	8.05007	7.89568	6.78408	7.21744	7.05531	7.19444	7.51843	6.03149	8.15018	7.56803	7.41015	6.72982	4.74783	8.6183	4.70652	6.33565	6.08526	7.61891	6.54726	7.64268	7.65823	8.05769	6.78257	7.21279	7.97854	5.40867	7.71468	5.52811	7.86339	9.03809	7.17345	8.1568	5.09579	7.80248	7.56821	5.62522	4.88532	11.5329
1999Q2	7.21426	6.46977	8.41102	9.08885	8.06369	6.76849	6.00224	9.04943	8.67203	6.62892	6.7468	8.05368	7.94556	6.78106	7.30227	7.02702	7.1864	7.56303	6.11294	8.20285	7.68033	7.40631	6.65544	4.78471	8.5874	4.74493	6.2779	6.1598	7.64188	6.72343	7.64476	7.6225	8.12178	6.82074	7.24375	8.00448	5.42053	7.70135	5.46947	7.84685	9.0174	7.06105	8.18191	5.26786	7.84202	7.57216	5.65948	4.75646	11.5452
1999Q3	7.23778	6.56855	8.33934	8.99826	8.03668	6.66313	6.00635	9.07238	8.69361	6.79868	6.68044	8.12257	7.932	6.84019	7.17982	7.02938	7.13542	7.63111	6.05678	8.18526	7.70616	7.40914	6.64552	4.65713	8.57181	4.91998	6.32972	6.06223	7.66638	6.58709	7.63868	7.64953	8.15536	6.83626	7.19093	7.9219	5.38602	7.73295	5.50533	7.86851	9.03809	7.03556	8.14623	5.15136	7.80452	7.59723	5.59595	4.79579	11.5345
1999Q4	7.23634	6.50029	8.29255	8.99987	8.06159	6.50976	5.97381	9.0789	8.71117	6.69497	6.66611	8.16328	7.93856	6.76773	7.19118	6.97759	7.11775	7.58206	6.10628	8.18961	7.69606	7.41176	6.60214	4.72739	8.50235	4.92967	6.40578	6.08374	7.5606	6.54917	7.59723	7.54486	8.08733	6.73459	7.22208	7.91486	5.37064	7.6353	5.55296	7.90088	8.9981	7.11531	8.08846	5.14943	7.781	7.56199	5.65483	4.88027	11.5203
2000Q1	7.23321	6.58709	8.30721	9.02437	8.02998	6.62052	5.96272	9.06751	8.68626	6.74091	6.6775	8.15574	7.87752	6.76311	7.22645	7.04461	7.12689	7.66607	6.1406	8.26058	7.7698	7.41075	6.61159	4.81489	8.53208	4.98589	6.30992	6.1181	7.54239	6.63551	7.66435	7.6508	8.08733	6.68378	7.1191	7.95461	5.37219	7.65838	5.74727	7.79578	9.11137	7.15514	8.17957	5.13971	7.72135	7.63659	5.5835	4.85723	11.5363
2000Q2	7.18007	6.25958	8.31834	9.04743	7.97109	6.4892	5.9153	9.06743	8.64065	6.57693	6.62407	8.02911	7.82857	6.64812	7.09838	6.90542	7.03644	7.53974	6.13195	8.13837	7.67925	7.29234	6.43935	4.80402	8.41885	4.55388	6.27852	6.16261	7.5353	6.49929	7.56872	7.55451	8.02246	6.57601	7.17012	7.8917	5.24702	7.60357	5.54778	7.67121	9.02946	7.05157	8.0823	5.15714	7.71616	7.52348	5.51879	4.75359	11.4742
2000Q3	7.1145	6.30323	8.23456	9.02345	8.06338	6.45834	5.79606	9.04034	8.61492	6.55583	6.69456	8.05389	7.82963	6.57971	7.07609	6.94698	7.02287	7.56355	6.0692	8.10862	7.5573	7.20983	6.47749	4.83363	8.43164	4.48488	6.19441	6.20388	7.44483	6.48667	7.63772	7.54345	8.03409	6.61562	7.1864	7.89816	5.15522	7.61135	5.65483	7.66294	9.07146	6.98841	8.07018	5.08554	7.74255	7.47949	5.53075	4.77912	11.4634
2000Q4	7.0992	6.41564	8.25903	9.15126	8.11522	6.50778	5.9567	9.05318	8.64565	6.3699	6.60168	7.95648	7.75748	6.44731	7.09479	6.91902	7.00367	7.65854	5.98394	8.01566	7.50623	7.15018	6.42108	4.80947	8.42843	4.41884	6.15768	6.2634	7.50458	6.46511	7.69515	7.58528	7.98775	6.4708	7.20117	7.86749	5.16288	7.59522	5.43518	7.61118	9.11497	7.01332	8.12819	5.15522	7.75705	7.56441	5.63835	4.73033	11.4843
2001Q1	7.18614	6.42703	8.3091	9.17613	8.12267	6.43401	6.02506	9.11651	8.69612	6.55346	6.72143	8.09224	7.93427	6.6062	7.06902	6.94473	6.98872	7.56976	5.99894	8.08825	7.66074	7.26076	6.52698	4.8701	8.59174	4.59175	6.19236	6.14204	7.42695	6.58479	7.67027	7.53173	8.10319	6.58249	7.27863	7.89208	5.21494	7.66794	5.55554	7.73032	9.12409	7.08423	8.16004	5.19665	7.81736	7.65665	5.63717	4.72443	11.5333
2001Q2	7.21524	6.51767	8.27656	9.07837	8.07226	6.44254	5.97381	9.18956	8.73451	6.63595	6.71619	8.12632	7.93987	6.65372	7.14335	7.00971	6.97759	7.55956	6.13701	8.15393	7.63756	7.34923	6.58203	4.86497	8.52761	4.80402	6.29465	6.16191	7.36286	6.50029	7.75534	7.59354	8.12474	6.75577	7.24518	7.85941	5.23467	7.64156	5.67332	7.76004	9.13727	7.04141	8.10259	5.07517	7.75548	7.55399	5.58725	4.80947	11.5345
2001Q3	7.18007	6.39637	8.29945	9.01059	7.9848	6.56339	5.93313	9.1735	8.63337	6.56056	6.61249	8.07703	7.83729	6.68918	7.09534	7.00033	6.99393	7.57216	6.1305	8.11422	7.62494	7.31344	6.43828	4.94402	8.52059	4.57471	6.34095	6.15627	7.43367	6.67876	7.75805	7.5778	8.05272	6.66398	7.1473	7.89083	5.19296	7.57883	5.59347	7.7006	9.09519	7.07553	8.05357	5.26442	7.75605	7.58511	5.65483	4.76217	11.4994
2001Q4	7.25323	6.45572	8.26531	9.06951	7.84607	6.53669	5.89256	9.23044	8.62545	6.70278	6.55536	8.05251	7.81736	6.7093	7.16832	7.01272	6.97167	7.58477	6.10554	8.02443	7.68279	7.35073	6.55914	4.84419	8.52331	4.84942	6.25383	6.13917	7.44483	6.42108	7.6345	7.61151	8.07403	6.71377	7.14703	7.89146	5.20401	7.6516	5.64662	7.71453	9.12533	7.02997	8.14255	5.12198	7.67941	7.54062	5.68245	4.6944	11.5137
2002Q1	7.38915	6.43668	8.33575	9.13956	7.90458	6.65329	6.09658	9.30036	8.69456	6.76427	6.63507	8.15479	7.89866	6.64336	7.23538	7.12823	7.07468	7.60804	6.29095	8.16432	7.73383	7.39388	6.61025	5.07517	8.61631	5.00618	6.29588	6.45572	7.50476	6.51915	7.68922	7.73105	8.16508	6.8083	7.24518	8.01599	5.39816	7.72253	5.97466	7.77275	9.15617	7.06276	8.26196	5.17048	7.75919	7.61661	5.71043	4.90527	11.5864
2002Q2	7.31876	6.57554	8.44125	9.15165	8.03008	6.53185	6.17864	9.17098	8.74247	6.66228	6.71133	8.1763	7.85399	6.63988	7.1869	7.07975	7.01121	7.57336	6.171	8.11612	7.65239	7.38026	6.59715	5.10392	8.59459	4.8701	6.35842	6.24222	7.51553	6.7334	7.59706	7.63884	8.11393	6.76581	7.28665	7.98253	5.20034	7.77975	5.62522	7.82631	9.22016	7.20613	8.18693	5.18178	7.89804	7.62933	5.73872	5.00171	11.582
2002Q3	7.30944	6.50927	8.40626	9.22877	7.99193	6.59896	6.15202	9.25627	8.74815	6.65887	6.75964	8.12287	7.85296	6.64812	7.22936	7.10879	7.00307	7.65144	6.18002	8.10259	7.64779	7.46279	6.56339	5.03911	8.61668	5.12595	6.35842	6.2653	7.4853	6.85961	7.72548	7.59589	8.0524	6.79309	7.30564	7.95496	5.12595	7.70225	5.61313	7.81803	9.22579	7.17063	8.31033	5.29163	7.9266	7.66372	5.75785	4.9028	11.5988
2002Q4	7.40286	6.54487	8.52695	9.31866	8.0057	6.5333	6.26783	9.35577	8.69389	6.88891	6.85961	8.22844	7.91474	6.70196	7.22037	7.11748	6.96728	7.5566	6.25831	8.17864	7.74731	7.48005	6.59669	5.21131	8.69762	4.92967	6.45572	6.20523	7.43071	6.80054	7.91571	7.67446	8.17508	6.93115	7.36539	8.03084	5.12792	7.72135	5.96529	7.8369	9.25257	7.21867	8.25245	5.34393	8.00325	7.67431	5.80413	5.07517	11.6609
2003Q1	7.35734	6.54917	8.44934	9.35039	7.87967	6.38912	6.08526	9.33694	8.69338	6.78106	6.84942	8.1274	7.80737	6.70645	7.16832	7.14283	6.83411	7.47174	6.20388	8.08569	7.80412	7.40529	6.64162	5.17991	8.51426	5.26269	6.53379	6.17725	7.39756	6.82183	7.82591	7.49034	8.12108	6.89905	7.38998	7.88244	4.94402	7.80615	5.66988	7.78531	9.23477	7.27909	8.24179	5.31812	7.97063	7.64922	5.67675	4.93926	11.615
2003Q2	7.40468	6.62936	8.50201	9.28495	7.87967	6.53717	6.32257	9.407	8.72307	6.97198	6.86763	8.19524	7.88771	6.71377	7.20786	7.23418	6.93731	7.72046	6.24481	8.16811	7.79317	7.46202	6.64812	5.22575	8.59576	5.15329	6.53282	6.27852	7.42932	6.79384	7.85386	7.59923	8.13496	6.8838	7.30496	7.89804	5.05412	7.81507	5.74193	7.88005	9.27109	7.28551	8.26393	5.3033	7.92335	7.71765	5.82895	5.05625	11.6523
2003Q3	7.54891	6.75344	8.61299	9.3428	7.96797	6.51718	6.39359	9.47634	8.83127	7.00367	6.99087	8.25079	7.96693	6.79347	7.3352	7.23032	6.95845	7.4948	6.33031	8.24652	7.92371	7.55817	6.8359	5.25923	8.6718	5.29998	6.57135	6.23637	7.46946	6.90241	7.963	7.62608	8.21465	7.02643	7.35479	8.04505	5.13776	7.87689	5.86552	7.96427	9.37622	7.30496	8.30697	5.19296	7.94721	7.75105	5.93401	5.116	11.7216
2003Q4	7.50347	6.69621	8.73139	9.45624	8.06432	6.53766	6.51521	9.53993	8.87608	6.94441	7.08785	8.21067	7.90446	6.86971	7.328	7.30765	7.03556	7.59119	6.31716	8.24144	7.88131	7.5606	6.87489	5.16479	8.69645	5.24878	6.5157	6.15486	7.50035	6.99393	8.04281	7.66278	8.1934	6.98903	7.35094	8.02932	5.23821	7.89469	5.88332	7.99362	9.32726	7.39552	8.28862	5.39967	7.94284	7.77863	5.97381	5.10796	11.7598
2004Q1	7.55538	6.66143	8.6512	9.45676	8.0097	6.608	6.48362	9.52391	8.86116	6.84375	6.94762	8.27944	7.91899	6.78559	7.36159	7.2044	7.04897	7.52474	6.41619	8.24355	7.8052	7.5482	6.85716	5.04557	8.74444	5.20766	6.51767	6.31536	7.45953	7.01061	8.04131	7.65286	8.19552	6.94505	7.36792	8.13856	5.16479	7.91474	6.04579	8.02704	9.37226	7.33433	8.29455	5.35501	7.92431	7.7633	5.99063	5.23644	11.7559
2004Q2	7.6194	6.65114	8.72062	9.40379	8.08044	6.57042	6.36762	9.64117	8.85104	6.96854	7.05503	8.2074	7.8736	6.78106	7.26822	7.30698	7.08674	7.50016	6.55251	8.20239	7.88407	7.5807	6.77346	5.18925	8.74566	5.35659	6.64162	6.28413	7.54662	6.97386	8.19497	7.6009	8.12612	6.98348	7.44872	8.17498	5.11199	7.94355	5.88332	8.01014	9.37825	7.38316	8.23845	5.48064	8.04751	7.71483	6.04737	5.25053	11.7744
2004Q3	7.60655	6.7746	8.84217	9.45035	8.07703	6.65458	6.47543	9.59426	8.88761	6.8977	7.09975	8.29953	7.87284	6.84304	7.32537	7.37128	7.05099	7.47779	6.35379	8.20804	7.85231	7.56924	6.83483	5.31485	8.75956	5.17238	6.54199	6.25958	7.49647	6.91572	7.99452	7.59622	8.12385	7.02287	7.52366	7.88846	5.11199	7.98922	5.792	8.05102	9.38857	7.47136	8.35381	5.28489	8.0241	7.7616	6.00717	5.43518	11.7768
2004Q4	7.65049	6.76427	8.81991	9.44568	8.02976	6.70605	6.48464	9.64791	8.837	6.94183	7.27263	8.20885	7.94165	6.64205	7.3072	7.38688	6.97883	7.6044	6.58617	8.21184	7.84867	7.6414	6.77954	5.43227	8.77013	5.52279	6.63507	6.34739	7.4853	6.98472	7.94897	7.68677	8.08887	7.08199	7.57062	7.92359	4.93687	8.04109	6.05444	8.07423	9.39013	7.4922	8.31214	5.43808	8.06934	7.78128	6.01453	5.3845	11.7937
2005Q1	7.57319	6.80683	8.74804	9.38648	8.13466	6.5615	6.44466	9.70139	8.87706	6.97386	7.34386	8.2487	7.83979	6.78106	7.33694	7.4896	7.02317	7.58748	6.46563	8.36303	7.73266	7.67477	6.82437	5.69933	8.79427	5.00841	6.64985	6.22785	7.46585	6.98224	7.88821	7.44444	8.21031	7.07862	7.60953	7.89008	4.96981	8.09803	5.94367	8.04687	9.44092	7.59472	8.26959	5.18178	8.12099	7.71587	6.06146	5.35028	11.8042
2005Q2	7.55451	6.76619	8.76468	9.41268	8.0791	6.64639	6.42433	9.73068	8.87001	6.921	7.28733	8.29038	7.86608	6.84482	7.328	7.37651	7.05818	7.66903	6.46614	8.12277	7.84698	7.63691	6.80351	5.7828	8.84515	5.04557	6.59396	6.27852	7.42317	6.97323	7.98684	7.60223	8.22121	7.13143	7.5994	8.00136	5.08965	8.17555	5.91889	8.05674	9.47693	7.59421	8.37824	5.49031	8.05177	7.72017	6.07228	5.39059	11.8202
2005Q3	7.60373	6.86311	8.78268	9.50777	8.12138	6.60032	6.41237	9.81538	8.94233	7.019	7.38956	8.3399	7.87182	6.91407	7.24945	7.39285	7.13303	7.51843	6.52601	8.06799	7.83926	7.53245	6.7837	5.79098	8.90581	5.26096	6.68752	6.31596	7.46451	6.99363	8.16042	7.70991	8.2494	7.17982	7.61841	8.14041	5.04986	8.16915	6.01778	8.12158	9.54467	7.5989	8.34759	5.41462	8.12563	7.76472	6.12687	5.42642	11.864
2005Q4	7.68616	6.97883	8.8499	9.33492	8.16347	6.3997	6.359	9.73562	8.97626	6.93472	7.39817	8.36093	7.89307	6.93537	7.17982	7.43386	7.03174	7.66825	6.44731	7.98775	7.77667	7.60672	7.02968	5.90536	8.90563	5.16097	6.76542	6.21727	7.44308	7.07553	8.16147	7.58172	8.23075	7.23514	7.63627	8.06285	4.90527	8.30334	6.03229	8.15364	9.63413	7.67105	8.3266	5.24175	8.20467	7.69515	5.97973	5.44961	11.8656
2006Q1	7.67307	6.84694	8.66464	9.24522	8.09763	6.53476	6.25447	9.75896	8.89891	7.01422	7.36792	8.33791	7.86339	6.90207	7.01272	7.52402	7.16652	7.62413	6.4677	7.92323	7.83069	7.4985	7.00246	5.92426	8.91584	5.05412	6.67624	6.20859	7.45472	7.07975	8.0791	7.62315	8.14526	7.17396	7.56112	8.13026	5.17991	8.25695	6.0692	8.16849	9.59261	7.6353	8.26153	5.4453	8.03485	7.7111	6.2272	5.45532	11.8295
2006Q2	7.55416	6.74209	8.52099	9.16108	7.88971	6.43562	6.16472	9.48004	8.86855	6.71133	7.21769	8.12937	7.60207	6.72583	7.06076	7.39285	6.87523	7.44366	6.34681	7.79166	7.55136	7.35904	7.07072	5.71703	8.8426	5.16859	6.41673	6.12541	7.28436	6.85646	7.724	7.46087	8.00692	7.10743	7.48941	7.94626	4.78192	8.14449	5.93842	8.00659	9.53484	7.51897	8.11452	5.30827	7.95402	7.51371	5.88146	5.31648	11.6831
2006Q3	7.57353	6.61428	8.2239	8.92377	7.74313	6.28476	6.01127	9.22009	8.77044	6.64422	7.07637	7.99125	7.47968	6.6098	6.99942	7.40184	6.70482	7.24756	6.1717	7.53725	7.36666	7.2761	6.98626	5.63121	8.75126	5.06681	6.25894	5.8796	7.19619	6.74954	7.49813	7.34902	7.88545	6.98718	7.35649	7.82191	4.71552	8.04836	5.792	7.99721	9.43764	7.46375	7.93702	5.26614	7.90138	7.32493	5.826	5.36129	11.5359
2006Q4	7.50568	6.60575	8.21049	8.77945	7.67136	6.24157	5.86458	9.09456	8.73804	6.64249	6.9269	7.84136	7.45838	6.4887	6.93212	7.66372	6.70114	7.2233	6.23637	7.4793	7.33997	7.16627	7.00276	5.57973	8.80572	5.13971	6.30931	5.94977	7.10058	6.66441	7.31588	7.35287	7.82976	6.89061	7.34536	7.8625	4.92967	7.97991	5.7589	8.05854	9.38709	7.53974	7.94638	5.07309	7.81615	7.37588	5.82895	5.50533	11.4993
2007Q1	7.47326	6.5487	8.3232	8.93735	7.58799	6.1276	6.05366	8.92386	8.62706	6.62804	6.99668	7.82258	7.49869	6.56948	7.0639	7.21008	6.64552	7.15044	6.20321	7.37275	7.23394	7.18539	7.0076	5.7704	8.7836	5.63121	6.2691	5.92693	7.06647	6.6695	7.46183	7.43229	7.76359	6.94473	7.35201	7.78142	5.00395	8.02617	5.85124	7.92793	9.33492	7.50879	7.91303	5.0626	7.94023	7.28345	5.73442	5.44242	11.4757
2007Q2	7.3788	6.44466	8.11003	8.64412	7.59001	6.15415	5.95238	8.81858	8.42741	6.59851	6.8171	7.71957	7.4526	6.47697	6.85435	7.24993	6.64336	7.12448	6.09807	7.27932	7.16059	7.1317	6.74563	5.68584	8.66969	5.16859	6.30017	5.77352	7.01451	6.66611	7.32493	7.27725	7.74139	6.86797	7.24423	7.87195	4.85463	7.87588	5.72359	7.80289	9.21453	7.32207	7.88093	4.98816	7.85192	7.28322	5.77662	5.3845	11.3565
2007Q3	7.26659	6.28538	7.86966	8.49023	7.42774	6.11368	5.70267	8.59181	8.27724	6.55488	6.69991	7.55399	7.32339	6.34212	6.59487	7.18387	6.52698	7.13913	6.0692	7.20464	6.99516	6.92592	6.70768	5.51343	8.56408	5.05199	6.28786	5.75363	6.95527	6.451	6.94055	7.19143	7.60223	6.90006	7.12555	7.7757	4.66658	7.78724	5.65249	7.73091	9.11801	7.17804	7.73135	4.79303	7.69818	7.18589	5.60947	5.32626	11.2224
2007Q4	7.15488	6.23376	7.5989	8.26916	7.23273	5.97973	5.59471	8.40857	8.02268	6.39024	6.56948	7.40529	7.21842	6.39359	6.62274	7.1309	6.53717	6.79533	5.79808	7.02317	6.79122	6.87316	6.52942	5.55167	8.45808	5.20217	6.04184	5.52943	6.75499	6.19848	7.0282	7.14887	7.52726	6.7916	6.92592	7.5999	4.62824	7.64715	5.7214	7.53938	9.0155	6.7972	7.64508	4.70351	7.50384	7.08924	5.64662	5.10595	11.0771
2008Q1	7.0338	6.07841	7.4909	8.00202	7.07186	5.93048	5.53602	8.29854	7.91181	6.30262	6.41945	7.12501	6.99942	6.10107	6.39415	7.0181	6.191	6.70605	5.68584	6.71093	6.59896	6.71296	6.48971	5.33111	8.31711	5.15136	6.04105	5.59842	6.77384	6.19916	6.32137	7.0079	7.28573	6.65887	6.64552	7.49979	4.40265	7.53369	5.48618	7.32141	8.91744	6.57182	7.58782	4.70351	7.40914	6.85576	5.57847	5.18739	10.9287
2008Q2	6.93764	6.15273	7.43642	7.98002	7.02346	5.51343	5.42935	8.17235	7.76613	6.19577	6.43455	7.07186	6.9979	6.00389	6.36188	6.97386	6.14704	6.63507	5.49443	6.81308	6.66611	6.47183	6.37843	5.20949	8.17122	4.98361	6.00059	5.33593	6.67119	6.09957	6.58479	7.00609	7.328	6.52258	6.62274	7.37734	4.34813	7.57285	5.7214	7.28276	8.87384	6.57508	7.40772	4.50351	7.32207	6.88175	5.2832	5.16288	10.8597
2008Q3	6.76003	5.93754	7.21891	7.8336	6.92625	5.586	5.44961	8.06201	7.51025	6.14562	6.20388	6.92919	6.90408	6.06068	6.24675	6.6958	6.11442	6.55678	5.49443	6.53039	6.5391	6.27162	6.18621	5.17991	8.07299	4.9102	6.00306	5.21312	6.57786	5.92604	6.45677	6.99912	7.17294	6.46511	6.44466	7.33302	4.24372	7.31255	5.53733	7.16935	8.75153	6.31476	7.34902	4.63473	7.21573	6.80424	5.18739	5.06048	10.7302
2008Q4	6.53766	5.7355	6.81527	7.64763	6.5216	5.17426	5.21855	7.78627	7.06362	5.87024	5.80614	6.6342	6.64292	5.67332	6.04737	6.55583	5.75257	6.39359	5.27471	6.40853	6.28724	5.97296	5.8898	4.82297	7.6909	4.97213	5.77765	4.77912	6.40688	5.7225	5.9108	6.75188	7.0079	6.27288	6.04501	7.03292	4.26268	6.99056	4.99496	6.72703	8.48934	6.25894	7.29302	4.19469	6.90809	6.52601	4.8828	4.83098	10.452
2009Q1	6.34856	5.60212	6.47028	7.3417	6.30506	4.80402	5.10998	7.55329	6.96098	5.80312	5.52943	6.47902	6.4599	5.59223	5.83286	6.79608	5.78792	6.25511	5.15906	5.96785	5.98896	5.8768	5.88239	4.64759	7.48362	3.10608	5.57721	4.68521	6.2239	5.64662	5.59966	6.632	6.69786	6.26846	5.93666	6.88415	3.61092	6.86971	4.99721	6.74013	8.43606	5.93136	7.05243	4.01338	6.71619	6.21261	4.79854	4.51086	10.2957
2009Q2	6.54343	5.7568	6.96351	7.61349	6.41945	5.19665	5.34074	7.66309	7.0079	6.07151	5.8387	6.48209	6.67582	5.72031	6.05052	6.75809	5.83578	6.50827	5.28827	6.19168	6.2804	6.10628	6.18621	4.72443	7.65413	4.99496	6.04184	4.81218	6.37786	5.77868	5.761	6.64812	6.75887	6.3636	6.171	7.03351	3.98279	6.98872	5.30827	6.83698	8.56357	6.31234	7.22548	4.20469	6.90241	6.45572	4.77632	4.58836	10.4554
2009Q3	6.71052	5.95411	7.1333	7.66653	6.49022	5.1985	5.53471	7.80941	7.17421	6.24546	6.16961	6.64596	6.77041	5.76728	6.28289	6.88551	5.93578	6.52209	5.42642	6.41237	6.41836	6.32197	6.07458	4.85463	7.74066	5.21131	5.89624	4.94876	6.40963	5.93578	6.21461	6.69909	6.80867	6.37104	6.19848	7.21793	4.06044	7.14335	5.41906	6.98255	8.73424	6.50827	7.2761	4.36522	7.09562	6.69167	5.07933	4.76217	10.5909
2009Q4	6.63551	6.02667	7.20638	7.74124	6.51669	5.22216	5.53996	7.91059	7.14467	6.15486	6.05444	6.64466	6.85506	5.75363	6.22059	6.79645	6.17933	6.57508	5.45817	6.44254	6.50429	6.32137	6.07151	4.85463	7.79852	5.01286	5.88146	5.1358	6.50329	5.9135	6.18346	6.6995	6.83983	6.61607	6.23506	7.24399	4.28588	7.16395	5.47646	7.03145	8.70151	6.47595	7.27379	4.42684	7.13463	6.54487	4.96051	4.57127	10.6075
2010Q1	6.67708	6.0129	7.09313	7.78044	6.87385	5.48756	5.56324	8.02541	7.18866	6.27225	6.1605	6.59122	6.89568	5.76832	6.20456	6.7972	6.11589	6.57554	5.54908	6.5662	6.51816	6.37218	5.96101	4.95583	7.86173	4.8701	6.0692	5.16859	6.5333	5.90989	6.45257	6.87282	6.9473	6.47028	6.33031	7.26333	4.37366	7.17396	5.51879	6.97292	8.73569	6.61383	7.20662	5.58099	7.22984	6.69043	4.81759	4.94639	10.663
2010Q2	6.46666	5.92604	6.73894	7.58443	6.50976	5.28151	5.31156	7.86198	7.0178	6.18484	5.85889	6.55108	6.72543	5.8796	6.12905	6.73022	6.20388	6.56197	5.54908	6.41945	6.37502	6.11442	5.92426	4.81759	7.69485	5.31321	5.84836	5.23289	6.42541	5.8309	6.01208	6.69084	6.76926	6.33505	6.14419	7.23321	4.23893	6.98008	5.23644	6.9841	8.62329	6.35784	7.25229	4.32634	7.06162	6.52698	4.98361	4.62824	10.5154
2010Q3	6.39248	5.73765	6.69745	7.56924	6.53814	5.27129	5.24175	7.74817	6.9979	6.09282	5.53996	6.39749	6.64596	5.64427	6.07535	6.69126	6.1033	6.47338	5.38143	6.41072	6.22191	6.1605	5.73334	4.72443	7.59823	4.96284	5.71812	4.9028	6.42595	5.7301	5.93136	6.6563	6.72263	6.30688	6.11516	7.13436	4.04888	6.87075	5.16669	6.76427	8.49167	6.28289	7.2349	4.21459	7.00488	6.38856	4.61842	4.58156	10.4303
2010Q4	6.44625	5.86268	6.69291	7.62152	6.61517	5.32788	5.24527	7.74587	7.00125	6.33091	5.6336	6.43668	6.62672	5.72031	5.95151	6.77954	6.04184	6.47492	5.48203	6.608	6.22983	6.23832	5.81909	4.70953	7.55433	5.08347	5.68923	5.0689	6.37786	5.75045	5.93666	6.88585	6.68211	6.26022	6.14776	7.55486	3.97656	6.93147	5.26096	6.73062	8.53477	6.29834	7.10579	4.59512	7.07157	6.40136	4.66658	4.85723	10.4789
2011Q1	6.44307	5.68471	6.69991	7.54168	6.54391	5.19296	5.2832	7.74788	7.02702	6.00471	5.58725	6.36876	6.54774	5.50398	5.96015	6.71012	5.79707	6.54247	5.071	6.46666	6.18277	5.98729	5.9162	4.65396	7.54186	5.24878	5.65832	4.96981	6.3659	5.55811	5.94803	6.50079	6.71377	6.28786	6.12905	7.06019	3.85015	6.91705	4.96284	6.73499	8.51813	6.21727	7.13276	3.94481	7.06817	6.34505	4.81489	4.59848	10.4128
2011Q2	6.41673	5.69933	6.74052	7.51698	6.64639	5.16479	5.30496	7.86083	7.05531	6.12395	5.61313	6.34388	6.64422	5.61313	5.92959	6.76196	5.97296	6.43935	5.04343	6.42811	6.23898	6.11368	5.6204	4.71552	7.61316	5.25576	5.66412	4.79579	6.18621	5.70932	5.93754	6.45834	6.62362	6.25511	5.96444	6.87109	3.89182	6.95496	5.18925	6.75032	8.5532	6.28413	7.13701	4.18459	6.96571	6.37673	4.66344	4.74203	10.4155
2011Q3	6.53862	5.70932	6.84233	7.45395	6.68877	5.03044	5.42053	7.94473	7.04316	6.18208	5.74193	6.3997	6.78784	5.61919	5.91979	6.69539	5.87587	6.51866	5.0689	6.451	6.2965	6.16191	5.7462	4.76786	7.5999	5.38755	5.74514	4.88027	6.19509	5.6618	5.9162	6.43882	6.66015	6.23637	6.11294	6.93212	3.95124	7.00276	5.32138	6.86589	8.59483	6.38912	7.14782	4.25325	7.01362	6.30992	4.77351	4.67283	10.4573
2011Q4	6.46251	5.81014	6.88244	7.58866	6.6995	5.18739	5.39211	7.97005	7.14362	6.21594	5.84836	6.49979	6.69662	5.48894	5.95929	6.69621	5.93225	6.59533	5.17238	6.58984	6.27413	6.20926	5.68017	4.9102	7.6791	5.60458	5.85793	4.8701	6.29527	5.61919	6.08904	6.51964	6.65243	6.3014	6.13917	6.96791	3.82864	7.00639	4.95583	6.97666	8.65388	6.41673	7.22669	4.15888	7.04839	6.31716	4.75646	4.67283	10.5032
2012Q1	6.40026	5.97889	7.04141	7.5749	6.84517	5.22395	5.39816	8.01588	7.21352	6.2928	6.04025	6.51026	6.84517	5.69933	6.00799	6.84197	6.13123	6.68211	5.17615	6.69374	6.50279	6.41999	5.75785	4.85981	7.7643	6.68711	5.90718	5.02388	6.34505	5.75363	6.09507	6.63463	6.66441	6.41564	6.20926	6.98841	3.96398	7.07129	5.53207	6.92461	8.71095	6.56995	7.30944	4.33947	7.17268	6.39804	4.70652	5.05625	10.5858
2012Q2	6.47902	5.9153	7.2349	7.61102	6.93925	5.19665	5.45247	8.09193	7.18362	6.29956	6.08374	6.53379	6.75499	5.62642	6.0692	6.77651	6.03389	6.62185	5.27129	6.73578	6.49476	6.31716	5.87399	4.96051	7.71794	5.51074	5.79504	5.1299	6.43133	5.6881	6.44783	6.61025	6.75305	6.4531	6.29465	7.1394	4.00733	7.06931	5.4848	6.94794	8.7414	6.62628	7.21401	4.51452	7.1869	6.41782	5.02388	4.77068	10.6041
2012Q3	6.63463	6.02183	7.24161	7.82817	7.05847	5.27811	5.41906	8.18414	7.28024	6.4708	6.17725	6.67161	6.77803	5.7828	6.05287	6.8645	6.09432	6.59578	5.36286	6.76234	6.5582	6.40963	5.96186	4.98816	7.81937	5.61677	5.89072	5.03261	6.36762	5.84064	6.48819	6.49325	6.80646	6.6053	6.31656	7.05243	4.07187	7.18766	5.43953	7.01061	8.79457	6.67456	7.30631	4.1795	7.2887	6.50279	4.74493	4.79579	10.6802
2012Q4	6.59304	6.14704	7.26962	7.87816	7.16033	5.37219	5.59471	8.37024	7.40691	6.44994	6.23572	6.71093	6.85189	5.9144	6.10554	6.91771	6.11368	6.71012	5.16097	6.8742	6.71861	6.75188	5.9428	5.07517	7.94473	5.74086	6.18689	5.01286	6.48209	5.85698	6.61517	6.50079	7.05272	6.71215	6.4531	7.06618	4.02535	7.29799	5.72793	7.16033	8.89266	6.81929	7.48043	4.08877	7.42257	6.56761	5.03261	4.79579	10.788

## Sheet: EPU index
Economic Policy Uncertainty Index
	Index	ln
1988Q1	117.003	4.7622
1988Q2	99.2604	4.59775
1988Q3	92.7586	4.53
1988Q4	104.73	4.65139
1989Q1	95.242	4.55642
1989Q2	96.7282	4.57191
1989Q3	90.0776	4.50067
1989Q4	101.803	4.62304
1990Q1	91.7076	4.51861
1990Q2	104.991	4.65388
1990Q3	136.786	4.91842
1990Q4	139.989	4.94156
1991Q1	135.371	4.90802
1991Q2	99.6001	4.60116
1991Q3	103.67	4.64121
1991Q4	122.472	4.80789
1992Q1	108.645	4.68808
1992Q2	102.237	4.62729
1992Q3	121.108	4.79669
1992Q4	121.397	4.79907
1993Q1	114.993	4.74488
1993Q2	123.183	4.81367
1993Q3	110.064	4.70106
1993Q4	82.3017	4.41039
1994Q1	87.3546	4.46998
1994Q2	96.5857	4.57043
1994Q3	89.8083	4.49768
1994Q4	86.8211	4.46385
1995Q1	90.7646	4.50827
1995Q2	73.4958	4.29723
1995Q3	75.0242	4.31781
1995Q4	85.1184	4.44404
1996Q1	79.7063	4.37835
1996Q2	73.3037	4.29461
1996Q3	78.396	4.36177
1996Q4	69.4617	4.24078
1997Q1	79.1112	4.37085
1997Q2	75.6415	4.32601
1997Q3	66.154	4.19199
1997Q4	83.3752	4.42335
1998Q1	85.8398	4.45248
1998Q2	74.9038	4.3162
1998Q3	104.143	4.64577
1998Q4	97.7465	4.58238
1999Q1	82.0964	4.40789
1999Q2	69.0197	4.23439
1999Q3	72.8315	4.28815
1999Q4	75.981	4.33048
2000Q1	81.2472	4.3975
2000Q2	88.7801	4.48616
2000Q3	73.5339	4.29775
2000Q4	107.947	4.68164
2001Q1	112.368	4.72178
2001Q2	102.822	4.633
2001Q3	124.412	4.8236
2001Q4	139.944	4.94124
2002Q1	95.8713	4.56301
2002Q2	89.4484	4.49366
2002Q3	116.675	4.75939
2002Q4	119.091	4.77989
2003Q1	142.888	4.96206
2003Q2	111.355	4.71273
2003Q3	98.024	4.58521
2003Q4	88.3528	4.48134
2004Q1	97.2714	4.5775
2004Q2	90.2838	4.50296
2004Q3	90.8283	4.50897
2004Q4	92.4588	4.52676
2005Q1	63.319	4.14818
2005Q2	73.1403	4.29238
2005Q3	74.7315	4.3139
2005Q4	75.3299	4.32188
2006Q1	72.111	4.27821
2006Q2	76.8335	4.34164
2006Q3	73.5727	4.29827
2006Q4	63.2045	4.14638
2007Q1	68.6586	4.22915
2007Q2	70.1416	4.25052
2007Q3	82.9857	4.41867
2007Q4	99.9711	4.60488
2008Q1	121.214	4.79756
2008Q2	96.8456	4.57312
2008Q3	130.845	4.87401
2008Q4	161.521	5.08463
2009Q1	180.358	5.19495
2009Q2	139.374	4.93716
2009Q3	147.285	4.99237
2009Q4	131.133	4.87621
2010Q1	139.525	4.93824
2010Q2	142.421	4.95879
2010Q3	169.397	5.13225
2010Q4	168.706	5.12815
2011Q1	153.576	5.03419
2011Q2	147.157	4.9915
2011Q3	215.664	5.37372
2011Q4	171.981	5.14738
2012Q1	155.38	5.04587
2012Q2	159.622	5.07281
2012Q3	173.823	5.15804
2012Q4	186.425	5.22803
